# Supplementary material for: Benchmarking Intrinsic Promoters and Terminators for Plant Synthetic Biology Research
Source: PubMed Central journal article supplement (PMC10521690; doi:10.34133/2022/9834989), 2022-05-26
Supplement: 9834989.f1.pdf [file 9834989.f1.pdf]

# Supplementary materials for

## **Benchmarking intrinsic promoters and terminators for plant synthetic biology research**

Chenfei Tian<sup>1,2</sup>, Yixin Zhang<sup>3</sup>, Jianhua Li<sup>1\*</sup>, Yong Wang<sup>1\*</sup>

*<sup>1</sup> CAS-Key Laboratory of Synthetic Biology, CAS Center for Excellence in Molecular Plant Sciences, Institute of Plant Physiology and Ecology, Chinese Academy of Sciences, Shanghai 200032, China*

*<sup>2</sup> University of Chinese Academy of Sciences, Beijing 100039, China*

*<sup>3</sup> College of Life Science, Jilin Agricultural University, Changchun 130118, PR China*

\* Corresponding author

Email address: yongwang@cemps.ac.cn (Y. Wang); jhli@cemps.ac.cn (J. Li).

Tel/Fax: 86-21-54924295

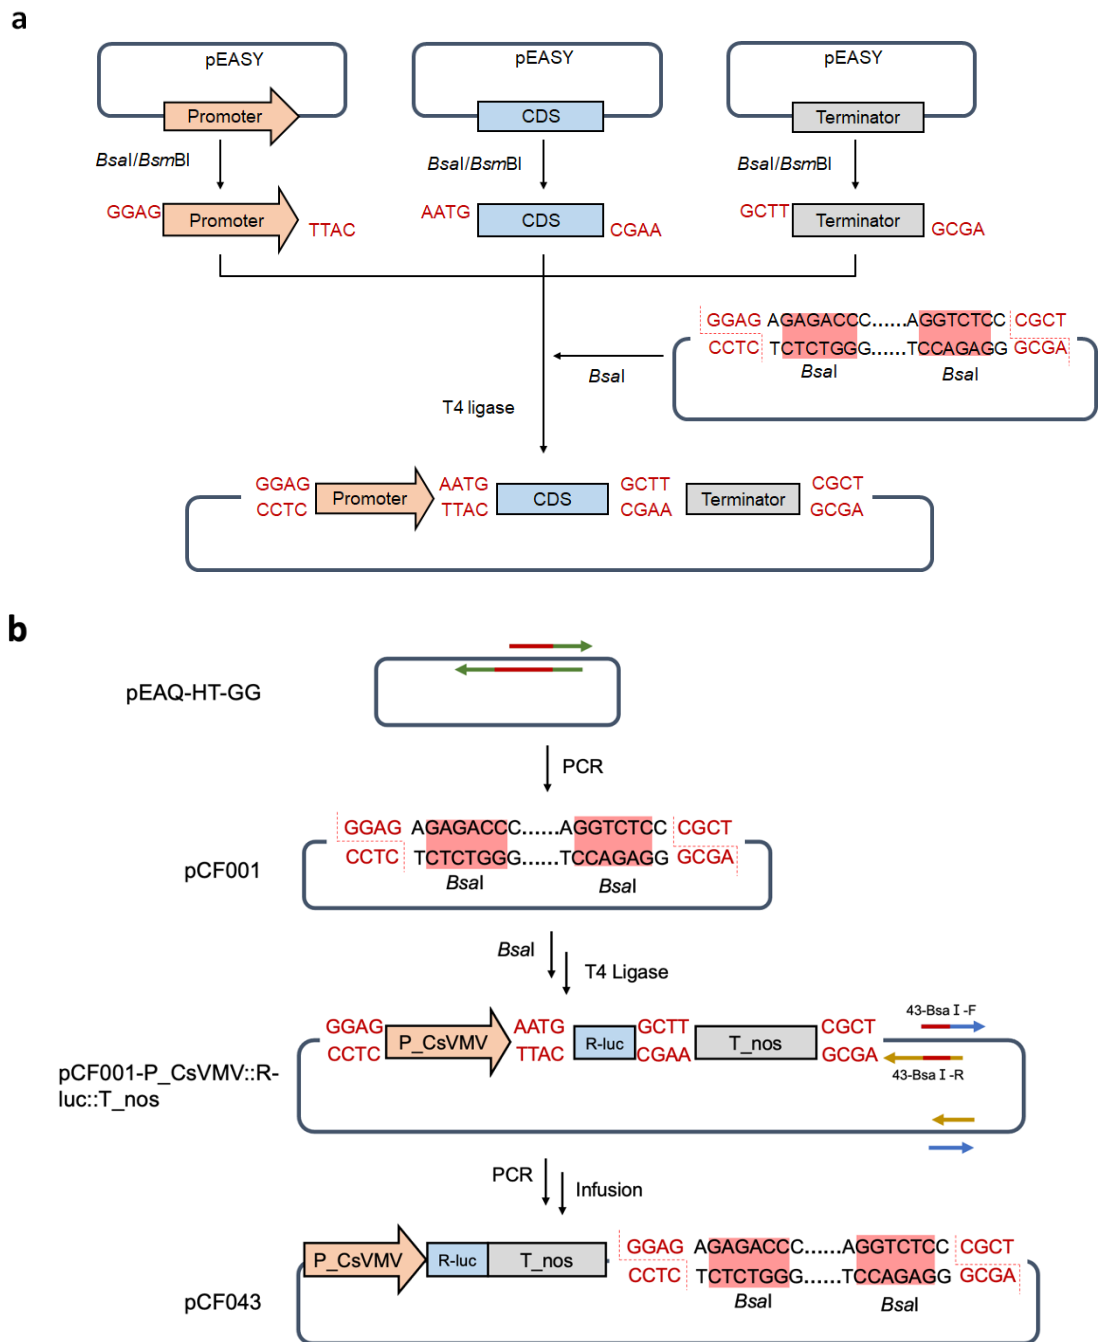

FIGURE S1. Type IIS assembly strategy for rapid plasmid construction. (a) Schematic diagram of plasmid construction. Standard genetic parts were inserted into the pEASY vector (TRANSGEN) with a standard restriction site. After digestion with *BsaI/BsmBI*, the genetic part segments with standardized 4-bp sticky ends could be sequentially linked by T4 ligase. The recognition sites of the Type II restriction enzymes *BsaI/BsmBI* were designed on the outside of both ends of the target fragment, so that the fragments recovered after digestion did not have the recognition site for digestion.

(b) GG3-*BsaI*-F/GG3-*BsaI*-R was used to PCR-amplify the pEAQ-HT-GG plasmid, adding the standard *BsaI* restriction sites with GGAG and CGCT 4-bp overhangs to pEAQ-HT-GG to obtain the basic vector pCF001. For dual-luciferase assays, the contrasting reporter gene REN was expressed under the P\_CsVMV promoter and the T\_nos terminator, and this cassette was constructed according to the method in (a). Two pairs of primers were used to PCR-amplify the pCF001-P\_CsVMV::REN-luc::T\_nos plasmid to append the standard *BsaI* restriction sites and obtain the vector pCF043 for dual-luciferase plasmid construction. The primers used for plasmid construction are listed in Supplementary Table 1.

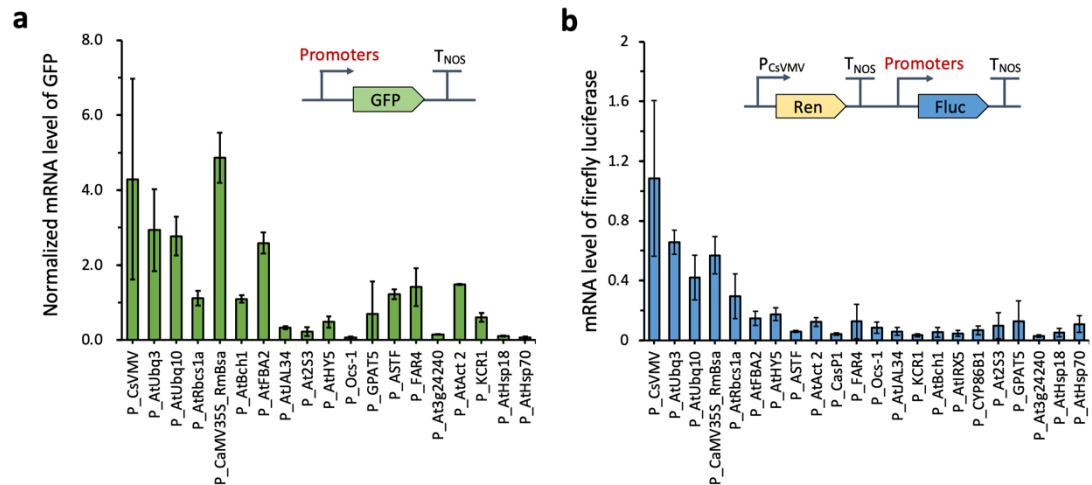

FIGURE S2. mRNA levels of reporter genes driven by different promoters. (a) normalized mRNA levels of GFP driven by different promoters. The internal reference used for qPCR was the actin gene. (b) normalized mRNA levels of firefly luciferase driven by different promoters. The internal reference used for qPCR was the *Renilla* luciferase gene in the plasmid. The mRNA expression levels were detected by real-time quantitative reverse transcription PCR. Data are presented as the mean  $\pm$  standard error of three independent replicates.

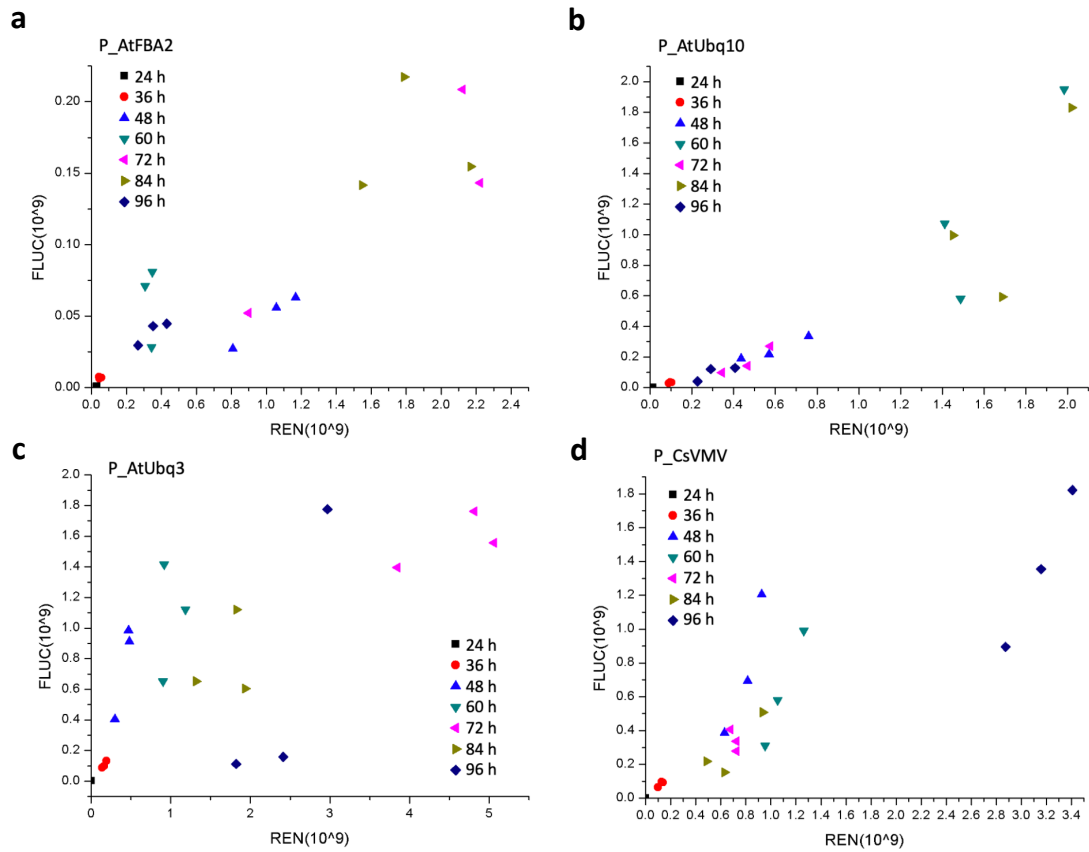

FIGURE S3. Dual-luciferase activity measurements with four representative promoters at different sampling times. Dual-luciferase activities with  $P_{CsVMV}::R-luc::T_{nos}$  and  $P_{AtFBA2}::F-luc::T_{nos}$  (a),  $P_{AtUbq10}::F-luc::T_{nos}$  (b),  $P_{AtUbq3}::F-luc::T_{nos}$  (c), and  $P_{CsVMV}::F-luc::T_{nos}$  (d).

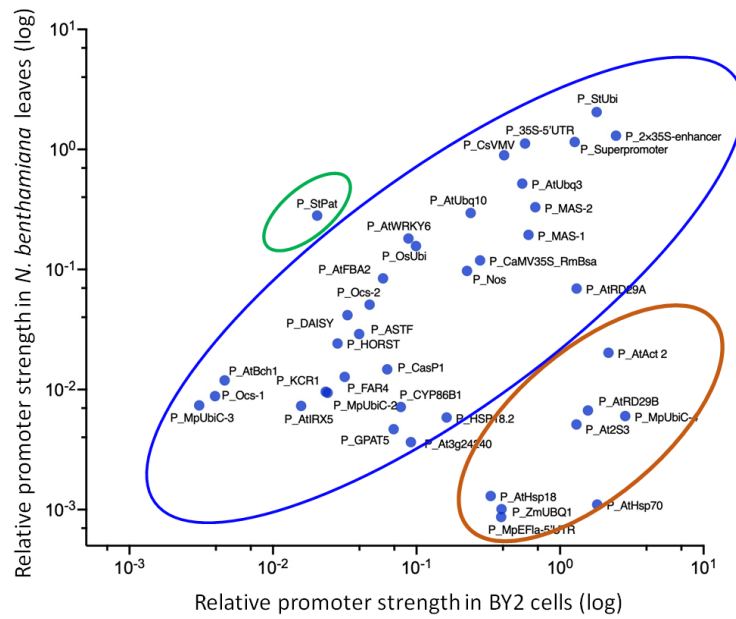

FIGURE S4. Comparison of relative transient expression levels of individual promoters in *N.benthamiana* leaves and BY2 cells. The relative promoter strengths (R-luc/F-luc activities) were monitored on a log scale. The scatter plots correspond to the relative strengths of the promoters. The plots located in the blue circle represent that the luminescence intensity is consistent within *N. benthamiana* and BY2 cells. The plots in the brown circle indicate represent that performance of promoters tested in BY2 cells are better than tested in *N.benthamiana*. The promoter P\_StPat in the green circle shows a higher expression level in *N. benthamiana* than in BY2 cells.

326-fold

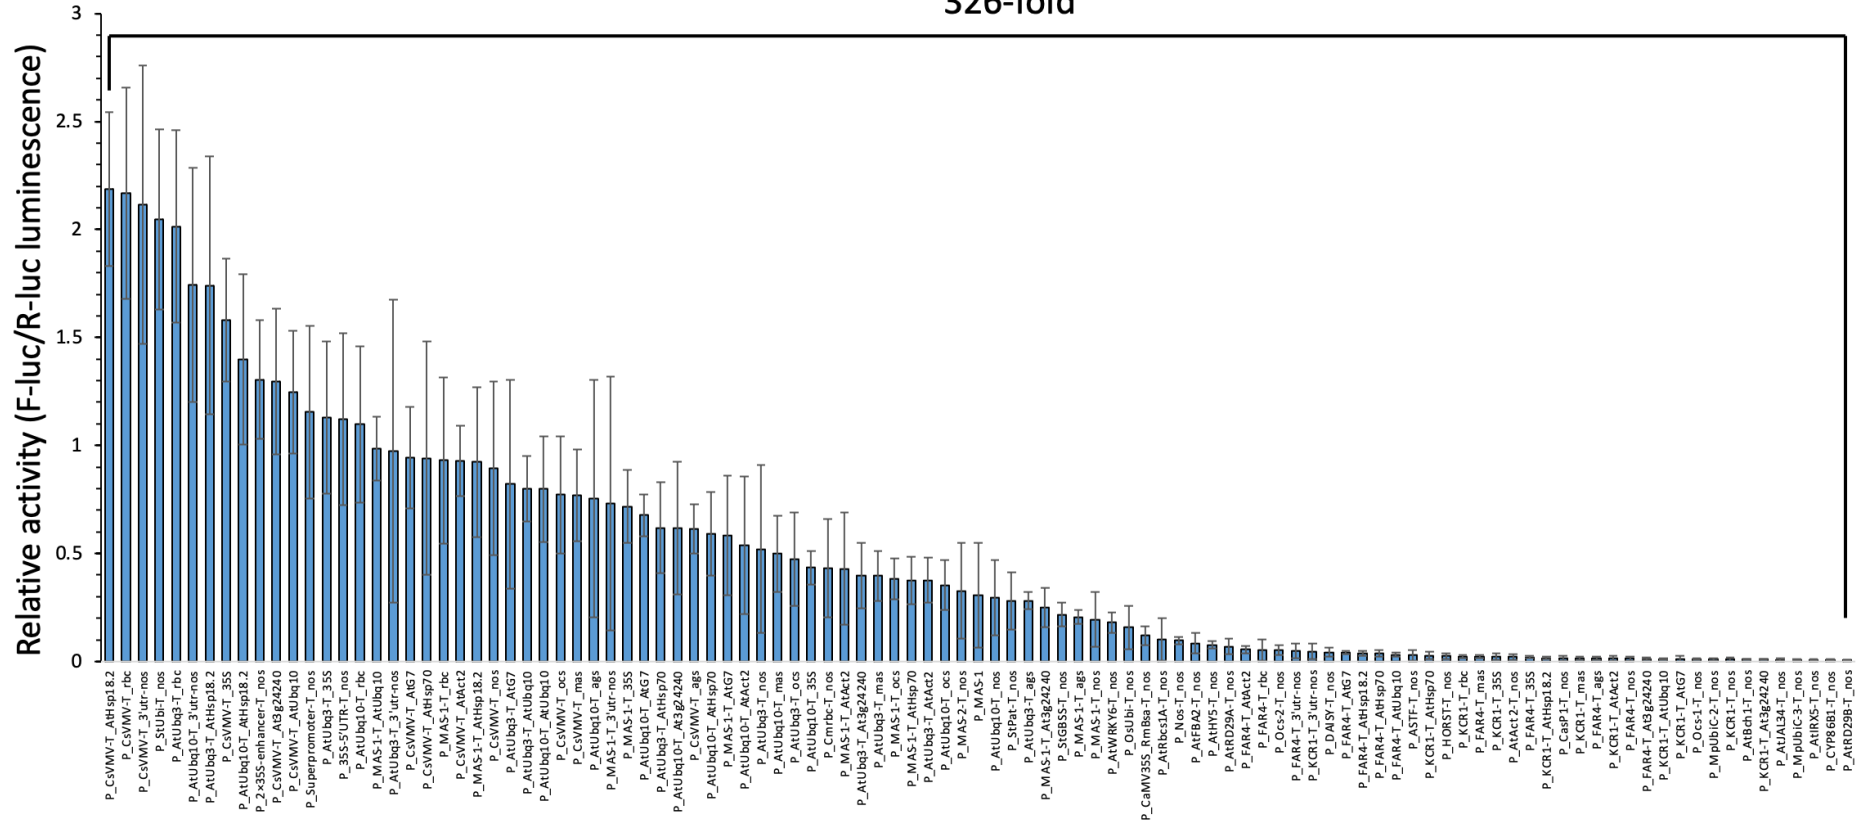

FIGURE S5. Expression cassette strength library obtained by integration of terminator elements. Expression cassette strength is presented as the ratio of firefly luciferase to *Renilla* luciferase luminescence intensity in *N. benthamiana*. These data are also shown in Figure 3 and Figure 5. Here,

we integrated different regulatory elements (promoters and terminators) to obtain more precise control of gene expression than that obtained by promoters alone.



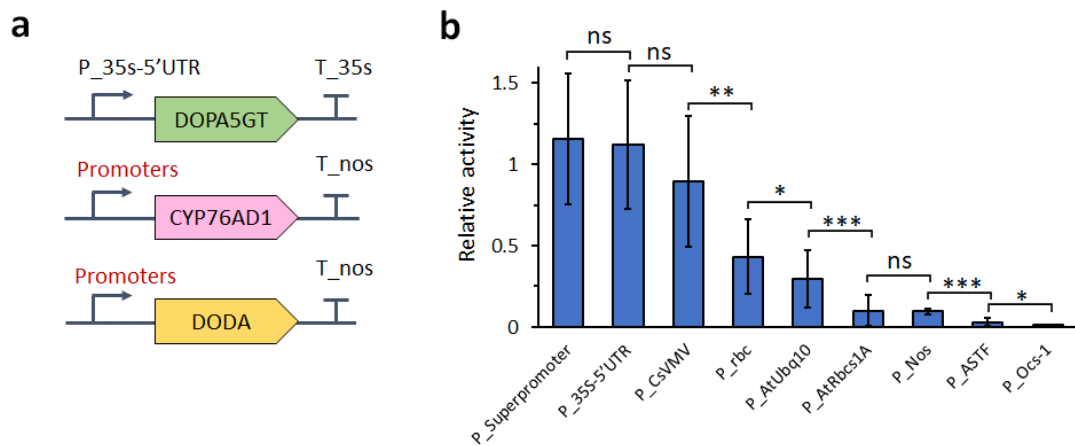

FIGURE S6. Different strengths of promoters used in betalain synthesis. (a) Schematic diagram of constructs used for betalain synthesis. DODA: DOPA 4,5-dioxygenase; DOPA5GT: cyclo-DOPA-5-O-glucosyltransferase. (b) Different strengths of promoters selected for use in betalain synthesis. The data are the same as the strengths shown in Figure 6.

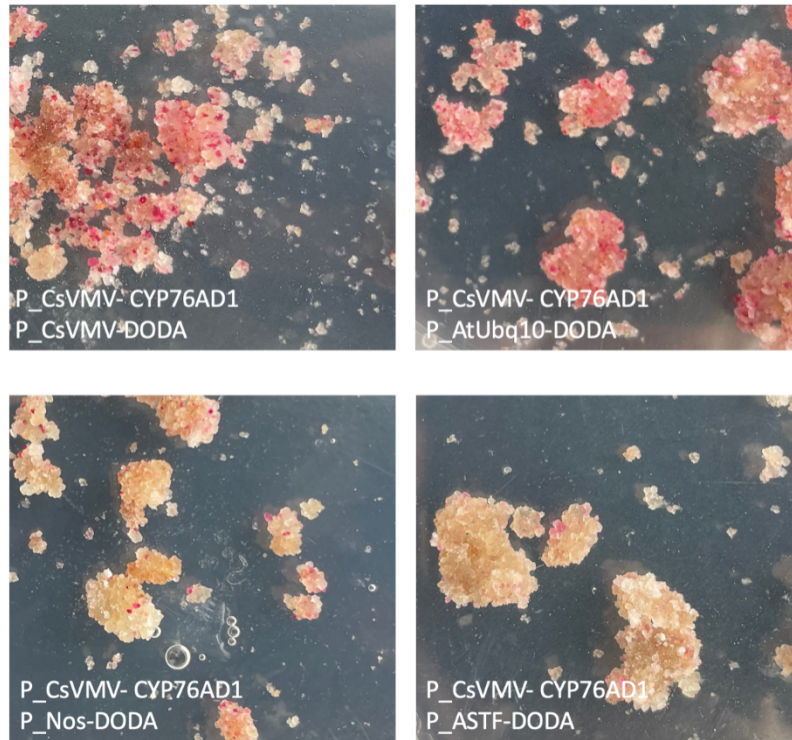

FIGURE S7. BY2-cells transformed with betalain synthesis genes. The cell-color phenotypes of BY2 cells co-infiltrated with *Agrobacterium* harboring plasmids for the expression of DOPA5GT, CYP76AD1, and DODA. DOPA5GT was controlled by the combination of P<sub>35S-5'UTR</sub> and T<sub>nos</sub>. CYP76AD1 and DODA were under the control of various promoters and T<sub>nos</sub>.

**Supplementary Table 1. Detailed information on the promoters used in this study**

| Element                                                                                                                                                                                                                                                                                                                                                                                                                                                                                                                                                                                                                                                                                                                                                                                                                                                                                                                                                                  | Species | Length | Reference                                                 |
|--------------------------------------------------------------------------------------------------------------------------------------------------------------------------------------------------------------------------------------------------------------------------------------------------------------------------------------------------------------------------------------------------------------------------------------------------------------------------------------------------------------------------------------------------------------------------------------------------------------------------------------------------------------------------------------------------------------------------------------------------------------------------------------------------------------------------------------------------------------------------------------------------------------------------------------------------------------------------|---------|--------|-----------------------------------------------------------|
| P_CaMV35S_R<br>mBsa                                                                                                                                                                                                                                                                                                                                                                                                                                                                                                                                                                                                                                                                                                                                                                                                                                                                                                                                                      | virus   | 315 bp | Peyret, H., et al., (2013). Plant Mol Biol 83:51-58.      |
| GGAAACCTCCTCGGATTCCATTGCCAGCTATCTGTCACTTTATTGAGAAGATAGTG<br>GAAAAGGAAGGTGGCTCCTACAAATGCCATCATTGCGATAAAGGAAAGGCCATCGT<br>TGAAGATGCCTCTGCCGACAGTGGTCCCAAAGATGGACCCCAACCCACGAGGAGCA<br>TCGTGGAAAAAGAAGACGTTCCAACCACGTCTTCAAAGCAAGTGGATTGATGTGAT<br>ATCTCCACTGACGTAAGGGATGACGCACAATCCCACTATCCTTCGCAAGACCCTTCC<br>TCTATATAAGGAAGTTCATTTCAATTTGGAGAGG                                                                                                                                                                                                                                                                                                                                                                                                                                                                                                                                                                                                                          |         |        |                                                           |
| P_CsVMV                                                                                                                                                                                                                                                                                                                                                                                                                                                                                                                                                                                                                                                                                                                                                                                                                                                                                                                                                                  | virus   | 520 bp |                                                           |
| CCAGAAGGTAATTATCCAAGATGTAGCATCAAGAATCCAATGTTTACGGGAAAAAC<br>TATGGAAGTATTATGTGAGCTCAGCAAGAAGCAGATCAATATGCGGCACATATGCA<br>ACCTATGTTCAAAAATGAAGAATGTACAGATACAAGATCCTATACTGCCAGAATAC<br>GAAGAAGAATACGTAGAAATTGAAAAAGAAGAACAGGCGAAGAAAAAGAATCTTG<br>AAGACGTAAGCACTGACGACAACAATGAAAAGAAGAAGATAAGGTCGGTGATTGT<br>GAAAGAGACATAGAGGACACATGTAAGGTGGAAAAATGTAAGGGCGGAAAAGTAACC<br>TTATCACAAGGAATCTTATCCCCACTACTTATCCTTTTATATTTTTCCGTGTCATT<br>TTTGCCCTTGAGTTTTCTATATAAGGAACCAAGTTCGGCATTGTGAAAACAAGAA<br>AAAATTTGGTGTAAGCTATTTTCTTTGAAGTACTGAGGATACAACCTTCAGAGAAATT<br>TGTAAGTTTGT                                                                                                                                                                                                                                                                                                                                                                                                  |         |        |                                                           |
| P_2×35S-<br>enhancer                                                                                                                                                                                                                                                                                                                                                                                                                                                                                                                                                                                                                                                                                                                                                                                                                                                                                                                                                     | virus   | 884 bp | Chung, S.M., et al., (2005). Trends Plant Sci 10:357-361. |
| GTGGAGCACGACACACTTGTCTACTCCAAAAATATCAAAGATACAGTCTCAGAAGA<br>CCAAAGGGCAATTGAGACTTTTCAACAAAGGGTAATATCCGGAAACCTCCTCGGAT<br>TCCATTGCCAGCTATCTGTCACTTTATTGTGAAGATAGTGGAAAAGGAAGGTGGCT<br>CCTACAAATGCCATCATTGCGATAAAGGAAAGGCCATCGTTGAAGATGCCTCTGCC<br>GACAGTGGTCCCAAAGATGGACCCCAACCCACGAGGAGCATCGTGGAAAAAGAAG<br>ACGTTCCAACCACGTCTTCAAAGCAAGTGGATTGATGTGATAACATGGTGGAGCAC<br>GACACACTTGTCTACTCCAAAAATATCAAAGATACAGTCTCAGAAGACCAAAGGGC<br>AATTGAGACTTTTCAACAAAGGGTAATATCCGGAAACCTCCTCGGATTCCATTGCC<br>AGCTATCTGTCACTTTATTGTGAAGATAGTGGAAAAGGAAGGTGGCTCCTACAAAT<br>GCCATCATTGCGATAAAGGAAAGGCCATCGTTGAAGATGCCTCTGCCGACAGTGGT<br>CCCAAAGATGGACCCCAACCCACGAGGAGCATCGTGGAAAAAGAAGACGTTCCAA<br>CCACGTCTTCAAAGCAAGTGGATTGATGTGATATCTCCACTGACGTAAGGGATGAC<br>GCACAATCCCACTATCCTTCGCAAGACCCTTCTCTATATAAGGAAGTTCATTTCAT<br>TTGGAGAGGACGTCGAGAGTTCTCAACACAACATATACAAAACAAACGAATCTCAA<br>GCAATCAAGCATTCTACTTCTATTGCAGCAATTTAAATCATTTCTTTTAAAGCAAAA<br>GCAATTTTCTGAAAATTTTCACCATTACGAACGATAG |         |        |                                                           |
| P_35S-5'UTR                                                                                                                                                                                                                                                                                                                                                                                                                                                                                                                                                                                                                                                                                                                                                                                                                                                                                                                                                              | virus   | 830 bp | Peyret, H., et al., (2013). Plant Mol Biol 83:51-58.      |
| GGAAACCTCCTCGGATTCCATTGCCAGCTATCTGTCACTTTATTGAGAAGATAGTG<br>GAAAAGGAAGGTGGCTCCTACAAATGCCATCATTGCGATAAAGGAAAGGCCATCGT<br>TGAAGATGCCTCTGCCGACAGTGGTCCCAAAGATGGACCCCAACCCACGAGGAGCA<br>TCGTGGAAAAAGAAGACGTTCCAACCACGTCTTCAAAGCAAGTGGATTGATGTGAT                                                                                                                                                                                                                                                                                                                                                                                                                                                                                                                                                                                                                                                                                                                             |         |        |                                                           |

ATCTCCACTGACGTAAGGGATGACGCACAATCCCACTATCCTTCGCAAGACCCTTCC  
TCTATATAAGGAAGTTCATTTTCATTTGGAGAGGTATTAATAATCTTAATAGGTTTTGA  
TAAAAGCGAACGTGGGGAAACCCGAACCAAACCTTCTTCTAAACTCTCTCATCTC  
TCTTAAAGCAAACCTCTCTTTGTCTTTCTTGCCTGAGCGATCTTCAACGTTGTCAGA  
TCGTGCTTCGGCACCAGTACAACGTTTTCTTCACTGAAGCGAAATCAAAGATCTCT  
TTGTGGACACGTAGTGCGGCGCCATTAATAACGTGTACTTGTCTATTCTTGTCCG  
TGTGGTCTTGGGAAAAGAAAGCTTGCTGGAGGCTGCTGTTCAGCCCCATACATTACT  
TGTTACGATTCTGCTGACTTTCGGCGGGTGCAATATCTCTACTTCTGCTTGACGAGG  
TATTGTTGCCTGACTTCTTTCTTCTTCTTCTTGTGATTGGTTCTATAAGAAATCTAG  
TATTTTCTTGGAAACAGAGTTTTCCCGTGGTTTTTCGAACTTGAGAAAAGATTGTTAA  
GCTTCTGTATATTCTGCCAAATTCGCG

---

P\_MAS-1     *Agrobacterium*     385 bp     Langridge, W.H., et al., (1989). Proc Natl Acad Sci USA  
86:3219-3223.

TTTTCAAATCAGTGCGCAAGACGTGACGTAAGTATCCGAGTCAGTTTTTATTTTTCT  
ACTAATTTGGTCGTTTATTTTCGGCGTGTAGGACATGGCAACCGGGCCTGAATTTTCG  
GGTATTCTGTTTCTATTCCAACCTTTTTCTTGATCCGCAGCCATTAACGACTTTTGAA  
TAGATACGCTGACACGCCAAGCCTCGCTAGTCAAAAAGTGTACCAAACAACGCTTTA  
CAGCAAGAACGGAATGCGCGTGACGCTCGCGGTGACGCCATTTTCGCCTTTTCAGAA  
ATGGATAAATAGCCTTGCTTCTTATTATATCTTCCCAAATTACCAATACATTACT  
AGCATCTGAATTCATAACCAATCTCGATACACCAAATCG

---

P\_MAS-2     *Agrobacterium*     392 bp     Chung, S.M., et al., (2005). Trends Plant Sci 10:357-361.

TGAGATTTTTCAAATCAGTGCGCAAGACGTGACGTAAGTATCTGAGCTAGTTTTTAT  
TTTTCTACTAATTTGGTCGTTTATTTTCGGCGTGTAGGACATGGCAACCGGGCCTGAA  
TTTCGCGGGTATTCTGTTTCTATTCCAACCTTTTTCTTGATCCGCAGCCATTAACGACT  
TTTGAATAGATACGCTGACACGCCAAGCCTCGCTAGTCAAAAAGTGTACCAAACAAC  
GCTTTACAGCAAGAACGGAATGCGCGTGACGCTCGCGGTGACGCCATTTTCGCCTTTT  
CAGAAATGGATAAATAGCCTTGCTTCTTATTATATCTTCCCAAATTACCAATACATT  
ACACTAGCATCTGAATTCATAACCAATCTCGATACACCAAATCGA

---

P\_Ocs-1     *Agrobacterium*     235 bp

ATCATTAAATTTCCACCTTCACCTACGATGGGGGGCATCGCACCGGTGAGTAATATTG  
TACGGCTAAGAGCGAATTTGGCCTGTAAGATCCTTTTTACCACAACATCCACAT  
TGATGGTAGGCAGAAAGTTAAAGGATTATCGCAAGTCAATACTTGCCATTATTG  
ATCTATTTAAAGGTGTGGCCTCAAGGATAATCGCAAACCATTATATTGCAATCTA  
CCAA

---

P\_Ocs-2     *Agrobacterium*     365 bp     Chung, S.M., et al., (2005). Trends Plant Sci 10:357-361.

CTGAAAGCGACGTTGGATGTTAACATCTACAAATTGCCTTTTCTTATCGACCATGTA  
CGTAAGCGCTTACGTTTTTGGTGGACCCTTGAGGAACTGGTAGCTGTTGTGGCCT  
GTGGTCTCAAGATGGATCATTAAATTTCCACCTTCACCTACGATGGGGGGCATCGCAC  
CGGTGAGTAATATTGTACGGCTAAGAGCGAATTTGGCCTGTAAGATCCTTTTTACCG  
ACAACATCCACATTGATGGTAGGCAGAAAGTTAAAGGATTATCGCAAGTCAATA  
CTTGCCATTATTGATCTATTTAAAGGTGTGGCCTCAAGGATAATCGCAAACCAT  
TATATTTGCAATCTACCAA

---

P\_Nos     *Agrobacterium*     289 bp     Chung, S.M., et al., (2005). Trends in Plant Science 10:357-361.

GATCATGAGCGGAGAATTAAGGGAGTCACGTTATGACCCCCGCCGATGACCGGGGA  
CAAGCCGTTTTACGTTTGGAACTGACAGAACCGCAACGTTGAAGGAGCCACTCAGC  
CGCGGGTTCTGGAGTTAATGAGCTAAGCACATACGTCAGAAACCATTATTGCGC  
GTTCAAAAAGTCGCCTAAGGTCACTATCAGCTAGCAAATATTTCTTGTCAAAAATGCT  
CCACTGACGTTCCATAAATCCCCTCGGTATCCAATTAGAGTCTCATATTTACTCTC  
AAT

---

P\_Superpromoter

*Agrobacterium* 1145 bp Ni, M., et al.,(1995). Plant J 7:661-676.

ACGGTATCGATAAGCTCGCGGATCCCTGAAAGCGACGTTGGATGTTAACATCTACA  
AATTGCCTTTTCTTATCGACCATGTACGTAAGCGCTTACGTTTTTGGTGGACCCTTGA  
GGAAACTGGTAGCTGTTGTGGGCCTGTGGTCTCAAGATGGATCATTAAATTTCCACCT  
TCACCTACGATGGGGGGCATCGCACCGGTGAGTAATATTGTACGGCTAAGAGCGAA  
TTTGGCCTGTAGGATCCCTGAAAGCGACGTTGGATGTTAACATCTACAAATTGCCTT  
TTCTTATCGACCATGTACGTAAGCGCTTACGTTTTTGGTGGACCCTTGAGGAAACTG  
GTAGCTGTTGTGGGCCTGTGGTCTCAAGATGGATCATTAAATTTCCACCTTCACCTAC  
GATGGGGGGCATCGCACCGGTGAGTAATATTGTACGGCTAAGAGCGAAATTTGGCCT  
GTAGGATCCCTGAAAGCGACGTTGGATGTTAACATCTACAAATTGCCTTTTCTTATC  
GACCATGTACGTAAGCGCTTACGTTTTTGGTGGACCCTTGAGGAAACTGGTAGCTGT  
TGTGGGCCTGTGGTCTCAAGATGGATCATTAAATTTCCACCTTCACCTACGATGGGGG  
GCATCGCACCGGTGAGTAATATTGTACGGCTAAGAGCGAAATTTGGCCTGTAGGATC  
CGCGAGCTGGTCAATCCCATTTGCTTTTGAAGCAGCTCAACATTGATCTCTTTCTCGA  
TCGAGGGAGATTTTTCAAATCAGTGCGCAAGACGTGACGTAAGTATCCGAGTCAGT  
TTTTATTTTCTACTAATTTGGTCTTTATTTTCGGCGTGTAGGACATGGCAACCGGGC  
CTGAATTTTCGCGGTATTCTGTTTCTATTCCAACTTTTTCTTGATCCGCAGCCATTAA  
CGACTTTTGAATAGATACGCTGACACGCCAAGCCTCGCTAGTCAAAAGTGTACCAA  
ACAACGCTTTACAGCAAGAACGGAAATGCGCGTGACGCTCGCGGTGACGCCATTTTCG  
CCTTTTCAGAAATGGATAAATAGCCTTGCTTCCTATTATATCTTCCCCCAAATTACCA  
ATACATTACACTAGCATCTGAATTTCCATAACCAATCTCGATACACCAAATCGACTCT  
AGG

---

P\_AtAct 2

*Arabidopsis* 791 bp Sarrion-Perdigones, A., et al., (2013). Plant Physiol 162:1618-1631.

ATGGAGTCGACAAAATTTAGAACGAACTTAATTATGATCTCAAATACATTGATACA  
TATCTCATCTAGATCTAGGTTATCATTATGTAAGAAAGTTTTGACGAATATGGCAGC  
ACAAAATGGCTAGACTCGATGTAATTGGTATCTCAACTCAACATTATACTTATACCA  
AACATTAGTTAGACAAAATTTAAACAACATTTTTTTATGTATGCAAGAGTCAGCATA  
TGTATAATTGATTCAGAAATCGTTTTGACGAGTTCGGATGTAGTAGTACCCATTATTT  
AATGTACATACTAATCGTGAATAGTGAATATGATGAAACATTGTATCTTATTGTATA  
AATATCCATAAACACATCATGAAAGACACTTTCTTTTCACGGTCTGAATTAATTATGA  
TACAATTCTAATAGAAAACGAATTAATTACGTTGAATTGTATGAAATCTAATTGAA  
CAAGCCAACCACGACGACGACTAACGTTGCCTGGATTGACTCGGTTAAGTTAACCC  
ACTAAAAAACGGAGCTGTCATGTAACACGCGGATCGAGCAGGTCACAGTCATGAA  
GCCATCAAAGCAAAAGAACTAATCCAAGGGCTGAGATGATTAATTAGTTTAAAAAT  
TAGTTAACACGAGGGAAAAGGCTGTCTGACAGCCAGGTCACGTTATCTTTACCTGT

---

GGTCGAAATGATTCGTGTCTGTCGATTTTAATTATTTTTTTGAAAGGCCGAAAATAA  
AGTTGTAAGAGATAAACCCGCCTATATAAATTCATATATTTTCCTCTCCGCTTTGAA

---

P\_AtFBA2

*Arabidopsis* 1111 bp Lu, W., et al., (2012). Gene 503:65-74.

CCTACACATCCACTTGGCCACCTGTTGTGCAATGATGACGATGAGATTGCAGTGTCT  
CTCGACTGATGATGTAGACTTCACAATCTCTTAAAAATCCCAGTACTTAACCTCAGC  
CTTAAGAAAACGCAGGGAACCTACGTCCTCACAAAATCTTCTCTTTGAGTGTAACCT  
TCAGACGCATCTTTGGCTCTAAATTCTAAAAAGGAAAATTTAATAGGTTTTTCATAA  
TCATGGGTTCACTGGATTAGCATATAAGTCTATGGTTGAGAACTTGAGACCCAGA  
CTAACGAAACCTCTTCCGGATCCAAAGGTCTCTTGTGTAGTTGACGTGGTAAACT  
CTCTACCGTCAAATTTAGACATTAGCTAATCTGATCAATAATCTCGGCAGCTCTTAA  
AAATTAATAATTAGAAATGATACGAACCTCATAATTTTTCTTTCTTATCAAAAACA  
CCATCTTTGTATCTTTATAAGCCTGTTGCCACTATTTTTAATTGAAAATGATGCGTTT  
GTCTTATGTTTTCTGTCCTGGAGTTCAACATTATGACAATATGTATAGTAAATTAGT  
GATATACAAGACGTTTGCAATTCAAGAAAAAACTTATAAACTAATTAATATTATG  
GTCCACGGTGCTACATATTAACCTTGATGGTTTTATACATCTTTTCTACATGCTAAT  
ATGCTTTTAATATTGTAGCCTAACGTTATAATTTGTTTTTTCTTAAAGAAACAGTATC  
TTGAACGAATCTTAACTATTTCTGTACTTATTCGATTTTATTCGATTTTTATCCGTGT  
AAAGGCAAACGATTATTATGTAACGACGGGCATAAAAAGAGTATCGATTCCTATT  
CGGAGAAAAAAAAGATAAAAATTGGAGTGTATGTATTTCTTGAATTGAGAG  
TAATACAAGATTACGGTCCAGGTGGCGGAATATTATTGGCAAGGTCACAAGAACCT  
CAAATAACTGATCTGAAGAGAAATATAAATCCAAAAGAGGGAGGTGAGAGATA  
AGGGTGGTGCATAAGCGTTTACTGTGAGTCTCTCAAAGAAACCAAAGGCAGAGAA  
AAGAGATAACACACACAAAAAAA

---

P\_AtRbc1a

*Arabidopsis* 1183 bp Farhi, M., et al. (2011). Nat Biotechnol 29:1072-1074

AACATTCATACGTTTTTCATTTGAAATATCCTCTATAATTATATTGAATTTGGCACATA  
ATAAGAAACCTAATTGGTGATTTATTTTACTAGTAAATTTCTGGTGATGGGCTTTCT  
ACTAGAAAGCTCTCGGAAAATCTTGACCAAATCCATATCCATGACTTCGATTGTT  
AACCTATTAGTTTTACAAACATACTATCAATATCATTGCAACGGAAAAGGTACA  
AGTAAAACATTCAATCCGATAGGGAAGTGATGTAGGAGGTTGGGAAGACAGGCC  
AGAAAGAGATTTATCTGACTTGTTTTGTGTATAGTTTTCAATGTTTCATAAAGGAAGA  
TGGAGACTTGAGAAGTTTTTTTTGGACTTTGTTTACTTTGTTGGGCGTTTTTTTTTTT  
TGATCAATAACTTTGTTGGGCTTATGATTTGTAATATTTTCGTGGACTCTTTAGTTTA  
TTTAGACGTGCTAACTTTGTTGGGCTTATGACTTGTTGTAACATATTGTAACAGATG  
ACTTGATGTGCGACTAATCTTTACACATTAAACATAGTTCTGTTTTTTGAAAGTTCTT  
ATTTTCATTTTTATTGAATGTTATATATTTTTCTATATTTATAATTCTAGTAAAAGG  
CAAAATTTGCTTTTAAATGAAAAAATATATATTCCACAGTTTCACCTAATCTTATG  
CATTTAGCAGTACAAATTCAAAATTTCCATTTTTATTCATGAATCATACCATTAT  
ATATTAACATAATCCAAGGTAAAAAAAAGGTATGAAAGCTCTATAGTAAAGTAAAT  
ATAAATTTCCATAAGGAAAGGGCAAGTCCACCAGGCAAGTAAATGAGCAAGC  
ACCACTCCACCATCACACAATTTCACTCATAGATAACGATAAGATTCATGGAATTAT  
CTTCCACGTGGCATTATTCCAGCGGTTCAAGCCGATAAGGGTCTCAACACCTCTCCT  
TAGGCCTTTGTGGCCGTTACCAAGTAAATTAACCTCACACATATCCCACTCAAAA  
TCCAACGGTGTAGATCCTAGTCCACTTGAATCTCATGTATCCTAGACCCTCCGATCA

---

CTCCAAAGCTTGTTCTCATTGTTGTTATCATTATATATAGATGACCAAAGCACTAGA  
CCAAACCTCAGTCACACAAAGAGTAAAGAAGAACA

---

P\_AtUbq10      *Arabidopsis*      643 bp      Sarrion-Perdigones, A., et al., (2013). Plant Physiol 162:1618-1631.

TACCCGACGAGTCAGTAATAAACGGCGTCAAAGTGGTTGCAGCCGGCACACACGAG  
TCGTGTTTATCAACTCAAAGCACAAATACTTTTCCTCAACCTAAAAATAAGGCAATT  
AGCCAAAACAACCTTTGCGTGTAACAACGCTCAATACACGTGTCATTTTATTATTA  
GCTATTGCTTCACCGCCTTAGCTTTCTCGTGACCTAGTCGTCCTCGTCTTTTCTTCTTC  
TTCTTCTATAAAAACAATACCCAAAGAGCTCTTCTTCTTCACAATTCAGATTTCAATTT  
CTCAAAATCTTAAAACTTTCTCTCAATTTCTCTTACCGTGATCAAGGTAAATTTCTG  
TGTTCTTATTCTCTCAAAATCTTCGATTTTGTTCGTTTCGATCCCAATTTCTGATAT  
GTTCTTTGGTTTAGATTCTGTTAATCTTAGATCGAAGACGATTTTCTGGGTTTGATCG  
TTAGATATCATCTTAATTCTCGATTAGGGTTTCATAGATATCATCCGATTTGTTCAA  
TAATTTGAGTTTTGTGAATAATTACTCTTCGATTTGTGATTTCTATCTAGATCTGGT  
GTTAGTTTCTAGTTTGTGCGATCGAATTTGTGATTAATCTGAGTTTTTCTGATTAAC  
ACT

---

P\_AtHsp18      *Arabidopsis*      838 bp      Farhi, M., et al. (2011). Nat Biotechnol 29:1072-1074

AAGCTTTTCTCTTCATTTCTCTTCTTTCTTTCTTTTCATGCAAGTTCTATTGATTAGAA  
ACCAAAACCATGACATATCACATTTTCAATTTTTAACCCCAAGTTTCCCAAAAAGGT  
AATCACAATTACTTTCCATGGTCATTTCTTCTGGTTCAAGCATGACATGAACAGGCA  
ATAAATAAGTTGAGATTTTGATCACAGTAACTGATACTTGAATCGAATCATTTAGAT  
TTTTTTTTTTTTAGTTTACTTGTGTTAGTAAATATGTTGTCTATGTTTGTACAAAAAC  
GTGGCTCAGTTCTTGTATATATGGAGACAAAAAATCCATTAAGATTGTTGACAT  
TCTCGGAAATTTAGTGCCAACTGTTATTGCGGAACTTACTATAGTTTTCCTTTGGC  
GAAAAGCTAATAATCTTAAATCTTGATTTTGTCTCTTTTCTCTGAGTTAGATTTTCT  
TAAATCCACTTCCGACCTATTAAGAAATGGGCTTTTGCAAAGAAGATCCGCTTAC  
TGAGCCCGTATCTCGAAGAGGATAATACAACAACAAGCAAACGGCACGTAGTTT  
TAATTGTAACCAAGGATTGCATTTCCGGTCTGTTTCAACAACGAAACTTCTGAAA  
TGCCAAGAAAAATCTGGTCATTTACCACAGTGATCATTGTGTATGTGTTCTAAAGA  
CTCCAAGCGAAGGTTTTAGAAAAAGGAGCATTTTCTATTCTATTCAAGAACTCGA  
AGAACATTCTCTTTCATCTCTAACTTCCCTATAAATATGTCCTTTGCTAATCAGAT  
CAAATCAGCAGGAAAATCAAGAACCAAAAAGTC

---

P\_AtHsp70      *Arabidopsis*      1982 bp      Sung, D.Y., et al., (2001). Plant Physiol 126:789-800.

GAACTGCGAAAAAAGGGAGCAATAAAGTTTCAGAAAACAAGCCCTTGACTGTATGTTG  
AGAAGAAATAAACATTACCTGCCATGGTCTTTCCAGTCAAGTGGCATAGGCCAAG  
CTCCAAACCATCCTCCAATAATTGCTCCATATGCTGGAACCTAAGGCATATGTTCTA  
TAATTCCGATTGGTCTAAAAGAAAAAAGATGGATTAACAACAACATAAAGTG  
TGTGAATTATCATACTAGGTAGCATAAGTGACTTACTTTAGTGAAGCAAAGATACG  
ATGCCAATCTATCCATGATGCACCTAAAACCTGCAGTTGCTGGTACAACCTATGAAA  
ATCAAAATCATCAGACACCATCAAAAGGTTTGTTCAAACTGCAGAAATACACATA  
TGGCATGGTATTAACATCTTTAAGTCATGGACACTGCAGCTTACCGTGAAAACAGA  
CATTAGAAAGGACCAGTGAATTGTTTTGATAGAGATCTGCATAAGATGAGAAGGT  
AATACTCATGTCAGCTTTTGAAAATCACACAATCTCCATGCAGAAGTGAGACCACA  
ACCAGCATTAAAGGAGCCTCATTTTTAATCTGGACAACCTGAAAAGTCCAGATTTACA

---

ATCAACATTTCCACAATTAGAAAGAAAATAAAAAGATATAGAGAAAAGAAGATCTTAG  
TGAAACATACTGCATTCCAATAGGTGCACCCAAAGAAACAGCTCCCAAAGCATTTA  
TAAGAGCACCTATTAACAAATCAAAACACAGGTATAGATATAGTAGACACAATCA  
AGGGATACTGAATCAGCAAAAGCACAAGATGAAAGCATAAGAAGCTCAGACTCAC  
TCACATCTTCAGGTTTAGCTTAACATCTAGAATTTCCAGGTGAACTCATTGAGCAAT  
CAACTTCTTTGAAAAATTAGTGAGCTATAATAAGCTGAAAAACAGAAATACTAACC  
GGCAATTAGTCCGACTAAGCTTCGGCCAACAGCTCTAAAGTACTGGAAATCAATGA  
GAAAATCATGAATACAGAGTCAAAACACACAAGACCAAAAATAACTATATGAAA  
AGAAACGATTTTTTTGAGCATTAAAGAGTGTAAGGTGAGGATACTAGCTTGTTTTGT  
AATTTCATAAAAGGAAATGAGACAAGCACAAGCAATCGAGTTAAAACGAGAAA  
TTCAGTTTCTTTAATTCTCACAGAGAACCTCAGAGATGAACTATACTCACCGAGCAT  
TTCTCTGGGTTTCGTCGGAACAAGCTGTAGATGATTACCACGATCGGGAECTAATA  
ATCTGAATATCAACATCAAAACAAAAAGGCTAAAATTAAGTAAAAATATCCACTA  
GCAACCAGGTTATGAAAGAAAGTTTTAGTACCCATAGGAGACGCAGAGTGAGAGTT  
GGATCAGAAATGAGATCGACAGAGTATTTGTTACGGACCACGTGAAATCCGAAGAT  
CAGAAATAACCCAGTAATCACATAAACAGCAAAAGCCCCCAAGTTGATATCGTGA  
TACTAACGGAGATTTCTGGATTCTTCTCTCTCTCGCTCTTTCATGGCTTTTCCTTC  
TCGTCTTCGAAATCACAGAACAAGTGAAGAAAGAAGACGTAAACAAAATATTGAA  
AATCCTCCAGAACTTACACTGGGCCTTTTATTCTATATACGGGCCTACAAGTTTATA  
CCATATGGGCTTTAATAGGCCATTTAATTATCAAGCGGTGCGCGGAGATAAAATAT  
ATCCCGGTGCGTGAATCCAGAACTCTTGTACGTTTTCGCGGATTTCTCCACCTTTCC  
ACAATCCCCTGGGTTGTGCCACGACCTTTTTTCTCGAAATGTCTCGTTCCTCTCGTCG  
GATTCGTATATATAGCTTCTTCCATCGTTTCCGATTCTTCATCAAAACAGATAAACAA  
ACAAAAGAAATCGAAAAACCTCACTTCCAATTTCAATTCAATTACTGAAGCTTTTTTT  
TAGCA

---

P\_At2S3

*Arabidopsis* 350 bp Emami, S., et al., (2013). Front Plant Sci 4:339.

GAAACCAAATTAACATAGGGTTTTTATTTAAATAAAAAGTTTAACTTCTTTTTAAAA  
AATTGTTTCATAGTGCATGTCAGAACAAGAGCTACAAATCACACATAGCATGCATA  
AGCGGAGCTATGATGAGTGGTATTGTTTTGTTTCGTCACCTGTCACTCTTTTCCAACAC  
ATAATCCCGACAACAACGTAAGAGCATCTCTCTCTCTCCACACACACTCATGCATGC  
ATGCATTCTTACACGTGATTGCCATGCAAATCTCCTTTCTCACCTATAAATACAAAC  
CAACCCTTCACTACACTCTTCACTCAAACCAAAAACAAGAAAACATACACAAATAGC  
AAAAC

---

P\_AtBch1

*Arabidopsis* 1985 bp Shih, P.M., et al., (2016). Nat Commun 7:13215.

TGCCTTAATCTTGTCTGCAATGTAGGGTATTGATGTCTTGAACGGCATAGTGACAAG  
CAACGCCTATTTGGTAATAAATCTCGCTATGCATGCGTTTTTCGAGTGGTGTGACTA  
TTTTGCTGACAAGGAGGATGTTAGCTATTGTGATTTAGTGCCACCAGCTGAACCCCT  
TTTAAGTATAATGAAGGAAATACCACCGCTGAGATAAGGGTGTCAATGGAGAAGA  
TGCAAACTGCACGACCCTAGGAACGTGAGGCAAAGAGACGAAAGTTTGGCGCTCTT  
GTTCCAGAGGACCAGTTTCTAGCTCAAATCCGGTAATGTTTTTGTTCCTTCCTTG  
TGACTAGACTCGTGTATCTAACTAGCAGTAATACATTTTCAGGGTCCCTTTAGGATC  
ATGATCAGAGTTTCTGGTGCAGACGACTATGTGGAGTCTTTGAAATCACGGTGGACT  
CGTTATCACACAGACAGATGTTAAGTGAAAGCTGGGGTTTTAGAGGACAACAAGT  
CATTGCACATTACAATGTTGGAGCAGGAGAAATTCTAACAGTGTCTTGGTGACAAG

---



GTTTTGTGCACATTAGCAATAGTCCGGTCATTCTTTAATGCAAACCATAATCTATA  
TTCATCCCAAAATCTCAGAATCCAAAGCGCAAGAGAATCAAACGTTTCATCATCTTA  
TATCTACAACGGCCTTAGCAGAAGAGTGTAATTGAAGGTCCATGACCCAAGTTGC  
AGTATCCATATCACAATTTGAGGTCCAAAAAAGAAAAAATAATAATTCTAT  
AAAAGAACCAAAAAACAAGATACTAGGAGGATTTGTCATAGTGAATAGTGATGT  
GACACGTAGAGAAAGCCCATATGGCATCATCAGCCTCATAAATGGGTGTAAC TTGT  
AAGGAACTTGTGCGTTCGTTTCTGGTTTGGAGCCTAACTTTTTGTTTCTTTGTCTTT  
CACCATCGCTGTTTCTGTGATTTTACGTTTATGCCATTTTAAGTTAAGGACTTAGTCC  
AGACATCTTAGAATTACATCATTATTCATCACGATATCGAAAATTATACAAATGACG  
TTTAGAACAAACGGATATAAACAATACAAAATCACACGCAATACACGGA ACTATGA  
CAACCATGCCACAAGTCTCCACATGTACTCATGTAGTGATGATGTAGCGTCC TAAAC  
ATATCCACATTCCTTAAAAATGAAAAATCTACTTTTTAGAAAACGAATCCAAAACA  
ATAGACAGTAAATGAATCTAGTAGAATTTCTACATAAGTTTACTTTCTCTATATATC  
TTATATTTTATAACAACAATAATGTTTATAAATTTGTTTCACCTTAATTATGGTTTAC  
AAAATACTGTATCTTGGATTTAATTA AAAAAGATAAATCATTTATAAACTAAATTGA  
TGTGATTCATACTAAAATACTAAAGTGTCTTAAGATATTGTTAGCTTTGTAGACAA  
GTGAGAAGAATAAAAAAAGGCTTTTGTATGGTTAAGTCTTATAGTAAATGCTAATT  
TGGTTTATAAAACATATTTATACTAAAATCTAGAAATTAATAAATTA AACATAACT  
GAGCTTATGTGAAAAAGGTAAGCAAATACATTTTTGGTCAAAGAAAAGATGGAAAA  
AAATCCAAAAAAGAAAACAAATATTATCAAAAAATAAGAAAGTAACCCATTTTGA  
GTGGGGTAATAATGTAAATGTGATATAAGGGTGGGGTAGGATTAGTCGCTAAAAA  
AACTTGAGGGCAATTTTAGTCACACGAACTAAACCATCCTTCACTTGTTAATTTA  
ATTTTGAAAAGGCAAAAAAAGAGCACTTACTTTACCCAAAAACAAAAAATCGT  
GGCCTCACTTGCATTTAAATCCATCCACACCACATCTCTCTCTGTCTATCTATCTC  
TCTCGCTCGCATAAAAGTTAACCTCAAACAAGTAGCTCCTCCTTCCATTAGG

---

P\_AtUbq3      *Arabidopsis*      1970 bp      Sarrion-Perdigones, A., et al., (2013). Plant Physiol 162:1618-1631.

CAGAGCTAAATTCCAAAAAATATGATCTTTGAACTTGCATCAATAACTAACGA  
TTCTAGGAAGAGCCCATTTGATTTCAACAAAAGATGAGAGCTTGATTACATATA  
AAATCAAGAGAAATTAACGACATTGAAGAGAATTCGATCTCGAAACCGGAAACAA  
AGACTTATAAGTCGATTAGTCTAATTCAATGCAGAAGAAAGAAATACCAGGTTTGGC  
CTTCACGATGGAAAGCTTCGGATTTGGAGCCAAGTCTCATAAACGCCATTGTGGAA  
GAAAGTCTTGAGTTGGTGGTAATGTAACAGAGTAGTAAGAACAGAGAAGAGAGAG  
AGTGTGAGATACATGAATTGTCGGGCAACAAAATCCTGAACATCTTATTTTAGCA  
AAGAGAAAGAGTTCCGAGTCTGTAGCAGAAGAGTGAGGAGAAATTTAAGCTCTTG  
ACTTGTGAATTGTTCCGCCTCTTGAATACTTCTTCAATCCTCATATATTCTTCTTAT  
GTTACCTGAAAACCGCATTTAATCTCGCGGTTTATTCCGGTTCAACATTTTTTTTG  
TTTTGAGTTATTATCTGGGCTTAATAACGCAGGCCTGAAATAAATTCAAGGCCAAC  
TGTTTTTTTTTTAAGAAGTTGCTGTTAAAAAAGGGAATTAACAACAAC  
AACAAAAAAGATAAAGAAAATAATAACAATTACTTTAATTGTAGACTAAAAAA  
CATAGATTTTATCATGAAAAAAGAGAAAAGAAATAAAA ACTTGATCAAAAAA  
AAACATACAGATCTTCTAATTATTAAC TTTCTTAAAAATTAGGTCCTTTTCCCAA  
CAATTAGGTTTAGAGTTTGGAAATTAACCAAAAAGATTGTTCTAAAAAATACTCA  
AATTTGGTAGATAAGTTTCCTTATTTAATTAGTCAATGGTAGATACTTTTTTTCTT

---

TTCTTTATTAGAGTAGATTAGAATCTTTTATGCCAAGTATTGATAAAATTAATCAAG  
AAGATAAACTATCATAATCAACATGAAATTTAAAAGAAAAATCTCATATATAGTATT  
AGTATTCTCTATATATATTATGATTGCTTATTCTTAATGGGTTGGGTTAACCAAGAC  
ATAGTCTTAATGGAAAGAATCTTTTTTGAACCTTTTCCTTATTGATTAAATCTTCTA  
TAGAAAAGAAAGAAATTATTTGAGGAAAAGTATATACAAAAAGAAAAATAGAAAA  
ATGTCAGTGAAGCAGATGTAATGGATGACCTAATCCAACCACCACCATAGGATGTT  
TCTACTTGAGTCGGTCTTTTAAAAACGCACGGTGGAAAAATATGACACGTATCATATG  
ATTCTTCCTTTAGTTTCGTGATAATAATCCTCAACTGATATCTTCCTTTTTTTGTTTT  
GGCTAAAGATATTTTATTCTCATTAATAGAAAAGACGGTTTTGGGCTTTTGGTTTGC  
GATATAAAGAAGACCTTCGTGTGGAAGATAATAATTCATCCTTTCGTCTTTTTCTGA  
CTCTTCAATCTCTCCAAAGCCTAAAGCGATCTCTGCAAATCTCTCGCGACTCTCTCT  
TTCAAGGTATATTTCTGATTCTTTTTGTTTTGATTTCGTATCTGATCTCCAATTTTG  
TTATGTGGATTATTGAATCTTTTGATAAATTGCTTTTGACAATATTGTTTCGTTTCGT  
CAATCCAGCTTCTAAATTTTGTCTGATTACTAAGATATCGATTTCGTAGTGTTCACAT  
CTGTGTAATTTCTTGCTTGATTGTGAAATTAGGATTTCAAGGACGATCTATTCAATT  
TTTGTGTTTTCTTTGTTTCGATTCTCTCTGTTTTAGGTTTTCTATGTTTAGATCCGTTTC  
TCTTTGGTGTGTTTTGATTTCTCTTACGGCTTTTGATTGGTATATGTTTCGCTGATTG  
GTTTCTACTTGTCTATTGTTTTATTTCAG

---

P\_At3g24240 *Arabidopsis* 1628 bp Shinohara, H., et al., (2016). Proc Natl Acad Sci USA 113:3897-3902.

GAAAAAGTGATGGAACTCGGAAAGGAAACATAATTAACACGAGATTATGTTAAT  
GATTTTATTTCTCAGACTGTATTTGTATTAGATAAAAAATCAATAAACCATTAGAAA  
TGGAAAAAATAAATGAAAATTCATTGGATCTAGCAAAAAGTTCAAGTCTAGTCA  
TCTTATTTCAAAGGATTTAATGTGTGAAATAAACAGCAATACAATATATCTAAT  
TTATAGAGTAACCTTGTTTTCTTAAGATTACATTTTCGGCTCAAAGGTTTAAAGTCAA  
GAAGATAACAATATAGAAAAGAAACAGTAAGCTACTAGAGTATTAACATAACATATA  
CAATAAAATATACTCAAGTAGAAACAAAGGGAATAAAAAACGAATCACTGATTCAA  
CCACTTGCTTGGGGTTTGGAGCAAACGCACTCGTTTACTTACAGGGGATTAAGCTAAA  
TAATTTCTTTAAAACAATCTTAATTAAGTATCCAACAGTAACATAAATAAAAAATAC  
TTATACCCATAAATTTACGTACCAACGCATATATATCAGACGGCTATTGAGTCCAGT  
TAGCACAAAAGTGTGGAATCTCGATAATAGCATGAGCAACTAGTTATTTTGTATA  
ATAAACTACGATGTTATATAGTATATAAGTAGATAAAACATTCTAATCTCGAAGTA  
ATATTTATATACACTTTTCGATTAAGCATAATTTGGCTTGTTTTAGTTTTACTTCAGC  
TTAGTCCTAAGAGATGAACTGAACTTTTGTAGTTTTTACTTATATCTTTTACAAATT  
TAACCACATTATATTAGATCGACAAAAGGGGAATTAATAAGATATAAGTATGTA  
CATTACATGATTCACGTAAACTATAAATTACTGACATACCACTAGTGGTTATAT  
CACCACAATAAGCATGTATCCATAGGTAATTTGTTACTAATTCTAGCTATTTAACA  
ATAGAATTTCTTTTTAATAATTTTTATCCGGAATTCTATACCGAGATAATCATATTT  
TTTCTTGAAAATATATTGATTAGATATTTACATAGTAAAAAAATAGAATATTTCC  
CCATATTGAAGAGCATTTTAATTAACCAAAATTTTTTTGTTACCTTACCATGTCTTT  
AACCAATATGTTTAGCTATTTACTTAATATCACTTTTAAACATCTTACCTTACGACT  
ATTTTCGTTTAGTTAGATATGTTTCTACTCTCCACGCAATGTATATGTATAATAACT  
AAAGAAAATTAGTACTAAAATATTACTGGTAAAGAAGAGATAGGCCATAAATAGGT  
GAGGTGGCAAAGAGGTGGGGTGGTGCAGTTTTGTTGATCTCAAGGCATTGTGTTTCC

---

CTATTTTCCTTTGTACTCTTTCTCCTCTCTTAAATCGCCACTCCATTATTTTAAATTC  
TTATCTTGATAAAACACACACACACAAGTATTAGAAGAACTTAAACCCTCTTATG  
TTCTCTCCTAAGCTTGAGTTTAATTCAAGCAAGAAACAGATTTTCGAGAGAAGAGTA  
AGCACAGAGATAGAGAGAAAGAAGGCACCAACCCTAAATGGGTCTAAACCCAAG  
ATTTAATCTTCTTTTCGTATTTTGAGGCAA

---

P\_AtJAL34 *Arabidopsis* 1471 bp Yamada, K., et al., (2011). Plant Cell Physiol 52:2039-2049.  
GCTAATGACATTAGATCGTAAATAAGTTCAGGATTTATTTGCTAAAATAGCTACAAA  
AATGTATATATAGATTTCAAATATACTTTTTAATCACTATTTTTTCGTGGAGTAGC  
TGTCTACGAATGTTCTATCCAATACATTCGAACACGTGATTGTTTCGTTAATTTTCTTG  
ATTCTGTAAGAGAAACAAAAATATAGATGTCCAACCTTTTTTTTTTCGGGTGGGAATA  
TAGACGTCCAGCTTAGCTACGTACTGAATAATTCAAAGTTCCAAACTAGTATATATT  
AATACAATTGACGATAAGGTCATAAGGATCGATGGATTCCAACGATTTCGATACAAG  
TATTAATGAAATAAGATAACACGATTGTGACAGCAAACCTCTATATTGATATTTCTAT  
TTTTTAATTAGCCATGCGTTGCACGATCAATTTACAAAATAATAAAAGAAAATGATC  
GATCAAAGAGCATTCCATTGAAATTTAATTCCATCCTGTAATCACATAATTTTGGGC  
CCAATCCTATTTTTCAAATGTAACATGCTATTACATAGTCACATAGAACATCCTAAA  
ATAGGGTTAAAATGTACTTTTATCTATTTGCAATTTTGATATTTTCTTTCTGAAAAA  
GATTAGTATATGGCAAATTATCTTTTAGATAAAAAGATCTTTTGTTCTGACTATACATT  
AATTTATTTTAAAAAAAACCTTAACAGATATATTTGCAAAATACAAAATGATGAAA  
AATAAAAGGGATACCATAATCTAAAATCTGACAAAGAAAATATACAAAAAGTCAA  
TTACGATACTTAGAAAAAGAACTATATATTTTTGGGTAGGGAAGTTCAAAAACAAA  
TTACCGATTTGCTGACTATATGAGCAATTATTACATACTTTTATTTATTTGTACAACA  
ATTATTACACATACTTGTGTGGACCAACATGATTAATTTTATATTGGCCATATGGTG  
CGTAGTAAATGTTATAATAACTTGAAATTAATAATAACTAAGCTCGACTCGATATA  
TAGATCCAACCAGTAGCCTCTCTTATTCACACCTAATCTTCATCTTCATCTTCGCATT  
CATAGTCTCTACGATCAGGTAATCCCCCTCTCTATCTATCTTTTCATATATGTGTGT  
ATGTGTAAACTATCTATATTCTGAAAATAGATCAATCAATTGATCTTTTCTATCTCA  
ATTGTTTTCAACAACCATCAGTTTGACTTTTGATCGTTTAAAGGCTCGAGAGAATTATC  
ATTCACTGTAGTAAAGATAGTTTATACCAACAAACCCATTTGGTGTGACCAGCTTT  
CAACATAAGTATGAGTTAGAGCTAGAACCGGATTAGTATTAATGTTACTTGTACCTG  
TTCATAGTACTAACCAAAAATGATCCAAAAAAATGAAAATAACAAAATAAACCATTT  
ATGGTTATCACAGATAGATAAAAAGAAGTCAACAACG

---

P\_AtWRKY6 *Arabidopsis* 1718 bp Robatzek, S., et al., (2002). Genes Dev 16:1139-1149.  
GTCGGTGACAAGCAACGAAACATAAATAATCGACTTTGTCAAGATATGTATAAAAA  
TCGACTTTGTATTTAGAGAACAAGGTCTTCATTATTTTCTTTTTTAACATTAGAGAA  
AGAGAACTAAAGGTCTACTTCAAGAAAACAAGAACTAGGTGCTTAGCTTTAATAA  
TATATCAAAGAAAAATGGGTCAAAAAATAAATTATTACATGAGTGGGGCCCGGCCG  
GCCACGGAAGTAAGACCTAACGACCAGCGCAACCGGTCACCAGTCAAGACTATTAG  
AAGCCGGGCCGTCAAAATCGTTGACTCGGTTTTTGTTCCTCAACTGTTTTGTATTTG  
TTAAAAATAAATTAATACTAATAAATAAGCTGAAAAAAAAGAAAAGAGAAAAGGT  
ATAATCACGTGGAACGCGCCGAGTAAACGGAGCGGTGGATCAAACCTTTTCGTCCG  
TTTGATCAAACAGAAGAGAACTAGTCAATGCTCTTTCTTCATATCACAATTTAATAG  
TCTCAAGACGATTACGCCACATAACCATTTTCTCGTGATTTTCGACATCAAATTTAA  
TAAAAGGAAGTATTGATTGGTCATCATGTTACAAGTGTCAAATGAGCTAATCCGTT

---

TTACAGTGGCATAGTTTACGATCAATTTACAAATTTTTGGTTTTATAACATACTTGTA  
GTTAAAACTATTTATAAGCTATTTATAGTGAGTTAGCTTATAAAACCCTATTCTTTTA  
TCTAAAAATTATGTTTTGACTCGTTTCATGATAAAAATTTTATCCTTTTCATCGGAATAA  
AAAACCTTATTATTTATTTGGCAAAAATAATTGGTGTA AAAATTATGTATATGTTAAT  
AACAAAAATATTAATCTGATTCATAATCTTAAAAAGAAAAATTTCTGAAATAA  
ACTTTAGACATTGTAAATAAAAAAACATTATTTTTATATAATGGGATGTTTATATGT  
AATTTTTTATAAAAAAATAAAAAGTTGTTTACTAGTAATCCGATTGGCTTTAACTATC  
GTCGCCAAAAGAATAATGTAGAAGTACTTTGAGGTAAAACCTAAAAGAAATTTGTA  
AGATAATAGTCACATTAATGCTAAAATTAATACATACTGATATATCGTATAAAAATT  
TATGAAAACCTACACCTTAACCTGAATCATACTGTAATAAAAAAAACAAATTATA  
TATAAACCTTAAAACTAATCATAAATCCCAAACGGTGTACTCTCTATTAGCTTTGA  
AAGGATTGCCCAATTGTTTGTAAAAATTTCTAATAATAGTACAATGTTTTGTTTCAT  
TTTTCTTTTCGTCAACCTGTTACCCAATAGCAAATGAAGTTTTTATGTGTGTGTGTG  
TGTGTGAATTTCCATGAAAATGAAACGGGCTTAGAATCCCGGTGTATTATGGGTCG  
GGTCGTAACCGGGCAATGACGCAGGATCTGACGTAAAACCTCCAAGAATTTTTTA  
AAAAGTCTCCGGAAAATAAAAATCAAAGTTCATTAACCTTAAAAAGAAAAACAAAA  
TCGGTCCACGTCCCAAACCTTTTTATAGGAGAGTCTTATGTTCTGGCAGAAGACTT  
CACAGACTCTTCTTAATCTCTCTCTTTCAACCAAACCCCTAAACAAAAA  
TACATTTTCTGATCTCTCTAAAAATCTTTCTCCTTCGTTAATCTCGTGATCTCTTCTT  
TTTCTATAT

---

P\_AtHY5

*Arabidopsis* 1700 bp Chattopadhyay, S., et al., (1998). Plant Cell 10:673-683.

GAGCATTGGGTGTTGGTGACGATGTTGATGACATCGACTTGTTTGGTTCAGTCACTG  
GTGATGTTGATGTTGATGTTGATAATGATGATGATGATAATGATGATGATGATAATG  
ATGATGATGATGATGACAGCGAAGAAGATGAAAGACCGACTAAGCTGAAGAATTG  
GCAGCTTAAAAGACTGGCTTATGCATTGAAAGCTGGGCGTCGTA AAACTAGTGTA  
GTTTTAGTTCAAGTGTGAAGTATGTTGAATACATTGTGTAAAGCATAGTGCTTGG  
TTAGTGTCTGCTTTGGAGATTTTGCTTACGAATTGTTTAAAGAGTTGACAAAGAACA  
GTAGTTCTCTGGTTTTCAAATGCATAATGATAACGGATGGTTTTGTTGTGATCTGTA  
GATTA AAAATCTGGCAGCTGAGGTTTGTCTTGACAGGGCTTATGTTCTTGAATTGCT  
TCGTGACCCGCTCCAAAGCTGCTAATGCTAAGTGCTACACTACCAGATGAAAAAC  
CGCCAGTAGCAGCACCTGAGAACTCCTCACCTGATCCAAGTCCGTGGAATCATTAT  
CAGCTGAAGATGTTGTGGTCTGAACCTAAGGAAAAAGTAAAAGATGAAGCAGTTCAT  
GTGATGCAACAGAGATGGTCTGCTCAGAAAAGAGTGAAGAAAGCTCACATTGAAA  
CGCTAGAGAAAGTTTACAGAAGATCAAACGACCCACTGTAAGGATTCTCCTTTTA  
CATTTGAATCAATTTCTATGTTACTTGAATGCTCTATCTCACATATGATCATGTTTGA  
TGATGCTGTGAATAGAATGCTGTGGTTAGCAGCATTGTTCAAGTGACCAATCTTCCA  
AGGAAGCGAGTTTTGAAGTGGTTCGAAGATAAAAAGAGCAGAAGACGGAGTTCAG  
ATAAGCGAGCTCCATATCAAGCTCCGGTTTGATCTAATGTTAACGTTGAGATGGCAA  
TGATTTGTATACTTGATTCTCAGAACTCATCAACATTGTCGTC AAGGACAAGTTTT  
TTGGTGATACGAGGAGTGTTTATAGTAGTAGATTCTGTCCAATGGTGTGGCTGGAT  
ATGTTGGACTATGAAATTTAGGATATCTTGTATTCAGTTTTTATTTTCTTGGCT  
GAGATTGTGCTTGTAGAAAACCGTTTCAACTTTGTTTGGTTTATGGCGGCTATAAA  
GTTTAATTTTAAATGCATGACAAAAACAAATCACAAAAATAAAATAAATTACTTTC  
ACGACACTTTTGAAAGCACTGCCCTAGGCGTGGGCCATGTGACAGAATGAAAGAAC

---

TCAGACCAAACCTTTTCTGTCCAAGGACAGGAATGGGGCCCACCCAATTAGCTCCCCT  
ATCCATTATTCACCGTAAGATGCTAACCAGATCTAACGGCTAAAATCCACCCACGTT  
CCAATCTCAATTGCCTTTGGATCCTTGTATTTCTCAAGGCTCACCTTTCTCCACGAT  
TCACTCTCGATATCCGTTTCGATTCTTCAGAGATCTGACGGCGGTAGCCAGAGTAATC  
TATTCCTTCCCAAATGTCTCGCAATTAGATTCTTTCCAAGTTCTTCTGTAAATCCCA  
AGTCCCCTCTTTTCTCTTTATCCTTTTACCAGCTTCGCTACTAAGACAACAAATC  
TTTCCCTCTCTCTCGCCTGATCGATCTTCAAAGAGTAAGAAAA

---

P\_CasP1

*Arabidopsis*

2088 bp

Naseer, S., et al., (2012). Proc Natl Acad Sci USA 109:10101-10106.

GGAGAATAACGCATGCATTGTATTTGTATTCAAAAAAAAAAATATTAACACAACATG  
AGAATTGGCGATTAAAGATTTTGACCTAGATAACGTTTATTATCAAAATCCAAACA  
ACTAAAAGAAAAGACATTGATTATTTTCAAGGAAAAGCTCTTTCCTCAGAAACATA  
CCCCAACAAAATAAAGTTTCGAGCTCTCTTCCAGATATGTTTCTAACATTTCGAGC  
TCTCTTTCAGATACGTTCTTTAACATTCGAGCGCTCTTTCAGATACATTCTTAAC  
ACCGAGCTTGCAGCAAACATAGACATCATCTGACGCCTGAACAATCTGATCATGGG  
AAAGGCTACGAGCACCCAATTACTCATACATATCTCCTTATCTTTCCTCACTCCCT  
GTACCCCAAACACTCCTCTACAATCTTCTCAAACGAACTATTGAGGAGCCTCGTAGG  
CAGATAGTGCCTTATGTCTAGAAGTCTCCATATCTCCAAGTATGAGGCGAATCTTTC  
GAGCTTGCCCTGGTCTTGGCTGTTCCAGACGCCGACAAAAGTGATTGTCTCATCTTC  
CAAGAACTTCAAGGACCTCAGGAATGCGTTTACAGTGAGACAAGTGGATGATGA  
GACAGCGGTTACCAACACATAGTTGGAGAATATCCGGTGGAGGATCGGAACCACCG  
GGTGCCATTGGACGTCGAGTCCAACAACGAGAGGGTGTGAGGAGCGAAGACGGC  
TGAAGAAACGGATGCTATGAATCCAACGGCGGATGGTTGAGGTAGTATGAGTGACC  
GTGACGATCAAACGTTCTCCAAAGAAATCGATGTAGCGGTTTTCTGGATATGGCG  
CTTTTGGATTCTTCTTCTGATCCTAGCCATTTAATCTGCATAAAAAGTGAGTATGAGA  
GAGAAGATTAATAGATATCAATCCTAACTAATATTCAAGAAAACATAATATAGAT  
CAATAAATTGATGAGAGTAAAAACACAAAGATGTTTAGAAATAATTATTGTCAAGA  
CTCAAGTTTCTTCAAAATATCAAGAGGCGCTTGAATAAGACCCTTATTCTACAATA  
CATCAATCTATATAGAGATAAAGACTAAGCATAATTTTTAAAAATAGAAAAATATA  
AACGTAAATAACACTTTTTTGAGGTAATACTAAATTTTCTAAACATGAAATGTTACA  
AATCCACAATATTTCCATATAAATTTGTAAATAATTTTTGTTAGATAATGTTAAAT  
TTTCTAAACTGAAATATTAACAAATCCGCAGTATTTCCATTATTAATCTCGATTTTG  
TTTCAATGGGAGATTGAAATTTGAACCAAAAAAAAAAAAAAAAAAGATTTTCATCAAGA  
TATCTAGGGGGATATTTGCTGGAATATAGCTTTGATGAGAATATTTATATTTGTA  
TCTCTGAAAATCAAGTTTAAAGGGGAAATGATTATGGGTTGAAATTTTGCAATCAA  
AAGCCCTAATTTGCAAAAACACTACATAAGTTTTTTGTTGGGCTGGCGCTATCGGATC  
CTTTTAGGCTTACATTTAACATCTGGTCCACTTAGAAAGAGTCACGTAGTATATGGT  
AATTGTCAACTTGATTTTTCAAGTTAAAAGAAATATGTATCAAAATGACTAAAAAGT  
AGTGAAATATTATGTATCTAATTTGTTTATTTACCAAATTAATGCTATAAAAATGTT  
CAACTGTACAATTGGCATGGAATAATATGAACATAAATCATAATTATTAAGCACTT  
TTGCCTACGAAGGGATACCAACTTCATTAGTTTACATTTTCTTTTGTGTTCAATTGTT  
AGCTCAAACCCAATTAAGTGGGGAAAGTAAGAAGCAACAACCTCCTTCCCGGACC  
CCTAACAAATCAACTAACTCAATATCAAACCATTTTTAAAAGAGCTCATATTAAC  
AGCTACTAATTATTCTTAATCAATCACTGCTTAATACAAAGCACTATATATACACTT

---

GTATCTTCCATTAGTTTCCCACCACAACACTACAAAACATTCCAATACACAACACACAA  
AGCACACACTTTTTCTTTCTTTTAAACCCCAATTGCAAGAGAA

P\_DAI5Y

*Arabidopsis*

2047 bp

Naseer, S., et al., (2012). Proc Natl Acad Sci USA 109:10101-10106.

GGAGATTAATGCTCGCTTTGATTGATGCAAACAATTTCTTCACTATAATAAGCGAA  
AATAATAGAAATAATAAAGATGGAAAACATAACAATTAATAGTAGAACTATATATAT  
ATATATCCACATATAAATCTTTTTTTTTTTGAGGGGTGGTTAAAACTAGCTATTTA  
GCTGGATGCTCGGCTATTCGGATTTGTGTAATAACTTCTAAATATTGAGCAATAGG  
TAAATATAGTGAATATTTAACCATGACAAAACAATAAACACACACACATCAGAGGA  
AACTTGGGAATGAACGTGAACAATAAAAAAAAAAATTAATAATGATAATAATAGTG  
GGCATAGAGATGGTTCTTCAACGAATTATTTCTTGCCCAAGTAGCACCGTTTGGTTA  
GAAATCTTCGACATTTATAGTTCAATTAATAAATACTACTCCATAATTTGGGTGA  
CTTACCACACAATCTTCCACAATCTTCGACACGCAATTCACAACAGTATCATAGT  
TTATTATCACACTTTAGTAATTTATGCCAAACCTCACTACGCAAGCAAACCTATGATT  
CATTAGATGTGTGGACAATTACGACGACAGCAAAAAATAATATGTGTGGACACAC  
AATGACAAACTCACATTGAACCTATCTTGAAATAAATTTATACTAAATCGTAGCGAAT  
ATATAATCAGTAAATAGAAGTTAAACTGAAGATCATAATCAACTAAAATGAATATC  
GTAATCAAATGATGATAATAATGATTTTCAAGACACAATAATGGTGACGGTGTGAT  
GATGAAAAGGATCTGTGGCATAACAACCTGATTGAATTCATGCATCTTCATGGGTTT  
TATCCGTTAGCTTTATCTTTCACGTCTTATATTCTTTAACTTTGTTATGTTATTGA  
CATTTAAATTCATTTGTATGCATGTTATGAAGAGATCGTATAACTACAAAAATATAA  
AGGTAAATCTTTCATTTTAAAAAGAAAATGTTTCTATACGTGTAATAAATTAGTAAA  
TAACACATATTTCTCCTGCGCGTAGCAGTTCAACAACTCTTCTTTCGCGTAGCT  
AGAAGCTGCAATAACATAAAGAAATGATATATTTATAAATTATGTGAAAATGAAAA  
AAAATATTAGTCCGCAATATCCACGTATCATTATGCGCCACGTAAACAAAGTGGAC  
CCAGAATAACCCTTGTTCAGTAGAAGGAATCAATCAGTGGCAAGAAAGAAAATA  
ATGAATTCATTAATCGCCACTCTCGAGCCATCAAAGTATCAAACAATTGATTGGA  
GTTAGTTGATCCTTCGCTACAAATTTTCTTACTCTGTTTTATAAGTATATAATA  
GTTCCACTAAAATCATTTTGGATACAACCTCAATAGATCTCAGCGTATTGTTTCTG  
TATGTTCAATGAATCCATCTCCATGCAATCTGGAGACTGGAGTATAAAATAACAC  
GTATGGTATGGTATTTATTTCTCATAGCTAGTTCCTTAACAGTTGGAAGAATTTATA  
CATGACCCGCCCCTTTAAACCTATCCCTACTACAAGACATTTGGGTACTTTCCAT  
CGACTTTTGAATGTGCATCAGGCATGAAAATCCTTTAATTATGCATATTTTATAATC  
AATGCTTAAATTACTATAAACACAAAAATTGTAGTGATATATTAGAAAGATAATTT  
AAATTGTTACATTGAAAAGATAATAAAAAATTATAAATAGACATCTGATATAAAAA  
TGGATGAAGTATAGCATATTAATAAAAAACATATGTTTTTGGTCAAAACAGAATCAAT  
GCATAGTTAGCTACCGCTACAACAATAACCATAGGGACTACGTACCATCCATAAC  
TACATTTTCTTAAATTGCATCCTCTTTCTAAAATTTTGCCTATAAATTCACAATAACA  
CTTCAACTTTTTAGGCCATAAGTTATCTCTTTCTCTACAATAAGCAATAAATCTCACC  
TCCCTTTTTTTTTTTTTTGTCTCGCTACTTTTGATTATCATTTAAACCAAAAAACCTA  
CC

P\_KCR1

*Arabidopsis*

2223 bp

Naseer, S., et al., (2012). Proc Natl Acad Sci USA 109:10101-10106.

GGAGCCAAGAAAGTTGGAAGAGGAAGTTTTGGGTCTGTCTACTATGGTAGGATGAA  
AGATGGGAAAGAAGTTGCAGTTAAGATAACTGCAGATCCTTCTAGCCACTTGAACA  
GACAATTTGTGACTGAGGTATTGTCTAATTTGCAGCCATTAAGTTGCTGCAAAAGTTT  
CTTAATTAGACGATTGAATTAACCAAATGTGCAGGTTGCTCTATTATCGAGAATTC  
ACCACAGGAACTTGGTTCCTTTGATTGGATATTGTGAAGAAGCAGATCGGCATTTT  
TGGTTTACGAATATATGCATAATGGAAGCTTGGGAGATCACTTGCATGGTATTACC  
AATTTCCCTTATATTTTCCCTGCCTAAGTTACGGATTTTCATTCTGTGAATAACTCATGA  
AATCCATCCTGTTAGGTTCAAGCGACTACAAGCCACTAGACTGGCTAACTCGGCTAC  
AAATTGCACAAGATGCTGCCAAAGGTTTGTAGCACAACTCAAGATTAATCTTTA  
GTGTGGCTATAATATGAATCCATTGGACAGACAAAACCTCAGATTATTACAGGTCTT  
GAATACTTGCATACTGGCTGCAATCCTAGTATTATTCATAGGGATGTGAAATCAAGT  
AATATTCTCCTGGACATTAACATGAGAGCCAAAGTATCTGACTTTGGACTCTCGAGA  
CAGACAGAGGAAGACTTAACTCATGTATCCAGTGTGCGAAAAGGAACTGTTGGATA  
CCTTGATCCAGAGTAAGTCTAACAACACAACCTCACAAAAGTATCCCTTTTTATGAA  
CTTTGACTGATAGATGCATTCTTTTACAGGTATTATGCTAGTCAGCAGCTGACTGA  
GAAGAGCGATGTCTACAGTTTTGGCGTTGTTCTTTTTGAATTACTCTCTGGAAAGAA  
GCCAGTCTCAGCAGAAGATTTTGGTCTGAACTGAATATAGTTCCTGGGTAAACA  
CCTCTAATCTTCTGTCCATTTTACCTTTGACCGTTTAAAGTACTACATGAACAACAT  
CAAGATTCACAAACCACATATCCTCTCTATGCTTTTCTGTTCCACCAACAGGCAAGA  
TCGCTGATCCGTAAAGGAGACGTGTGCGGGATCATAGATCCATGTATAGCAAGCAA  
CGTGAAGATCGAGTCAGTCTGGAGAGTTGCAGAGGTCGAAAACCAATGTGTTGAGC  
AGCGTGGACATAACAGGCCAAGGATGCAGGAAGTAATAGTGGCAATACAAGACGC  
GATCAGGATCGAGAGAGGAAACGAAAATGGACTGAAGTCATCGAGTTCAAGCAGC  
TCAAAGGCACAATCATCTCGTAAAACCTTGCTTACTAGCTTCCCTCGAGCTAGAGAGC  
CCTGACATCTCAAGAAACAGCCTAGCTCCAGCTGCTAGGTGAGTCCTCTTAAAGCTC  
GAGCTCTCATGTTTACCCTTTGGACTTACCATCGTCACATAGATGAATACATTATAT  
ACGTATTAATAATGTGTGTATGTGATGTAGTGTCAAATTTAATCTGTATCTCTTTACA  
CACTTCTGACATGACATTGTGTAGATGTTTTAGTTGATGATAGCACAAAACCATAAT  
TTAATTATTGAAGGTAACAACATAATATGCTATCTATCTCCTATGCTGATGAAGACG  
ACAAATTTCCAAAACAATTCTTGCATGTCTTGTGTGTCAGGGAGTAGCCAATTGTCAA  
AAGACTCGAAAACAATGATACAAATGCACCACTCATAATTTACGATCAACCATT  
TGTACAAAACCTCAAGAAATCTAAAATTGTGTCTAAAACAATGTCACACTGTTTCC  
TATGTTTTGTTTACCCTTGGTTTCCCTCTATTCCGCTTTTACCATATGAAACCTTG  
TTTTGTATTGCACAATTCACCATGAAAGCCTAAATTTACCATTTTTGGCAAGTAAAA  
TAATCTGTCAACATCAGAAGGTGCCAATTCAATACTCAAACATCACATGAAACCA  
AATTTTAAGGAAGAAGCCAACACAAAGACAATAAAATTAATCAAAAATAAACAAA  
GGAGAGAGACAGAAGAAACAGAGAGAGTAGTTAATCCGGTGGTTTTCTGCTCATC  
TACTTCTATCCACCTTCGTCCCTTCCGCCCAAAAATTCAAATCTCTCTTCTTCTCTC  
TCTTCTCCTTAAAACTCTAACTTTACTCATCTCATCTCCAAAGTCTCAACCTTCT  
TCTCT

---

P\_HORST

*Arabidopsis* 2055 bp Shih, P.M., et al., (2016). Nat Commun 7:13215.

GGAGTATGCATCGATGATGATTCTGCCTCACTTAGAAGAATCAAAAAGCTAAAAGG  
AGCTGCGAATCCTGGGCAACGATGACTTAGTATGTATAGAAGAAAAAAGCTTT  
TACTTGGTATCAAACAGAGCATGTGTTGTTGATTTGCTACCTTTTTCTGCAAAGTTA

---

TTGGCAATTGTATTGTTGTTCCACTTGTATATATACAGAGACCATTTATGTTAATATA  
CAACTTCGTATGGGGAAAGATGATTCCATCAAGTCCAAAATGCCAAAACCATGCAC  
GATCTTGTCTGATCAAGTATGATAAGATGTGAGATTTTAAGAACGTGAAGCTTTTCA  
TATTGTATTCTCAATGAACGAAGAATTAATAATTAGAGTTAGAAAATGCAGATTACA  
GAGATTACACAATTTGATCTCATTCTTGGCAAAGAGGCCACCGCCACCGAAGCCA  
CCGTCCTTCTTTGGATTCCCTGTGTGTTAATTTTCGTGTGGCTTTAGTTACAAAAGGGAT  
TATATTGTCAGCGAATCTGAGCCGTTGGATCGTTTTGACATGAGCTTTCCATAAGTG  
TCTTATCCTTTGTTTCTCTCATTTTTCACATATGTATCAGACATTTAATCAAGCACAT  
ATCTACGTGTTGATTATGTTGATGATGCTGAGATTATGTTGATTTAGAGAATGAGTA  
TTGGTGATGATGGTACACGTTAGTAAACATATGAATTTGGAAGTGCCACGTGAGAG  
GGAGCAGAGTTTTGGGCTTTCTTTGGTTATGTATTTGCATTCTTGTGTAACAAATT  
CTCTTATTAAGCATTGTGAAAAAACCAAATACCACATAGTCTATGTTTCAAGAT  
TTGTTTTTAATACTATAATTTTCTATTACTTTAGTTTGTGTAATTTTGGAAAAGAGA  
AAATTGGTATTTTTAGGATTGGGTGATCTGAAATTTGACTACAAAATTTTCTTGG  
ACACAGACACACAGTCACACAAAATAAGCTAATTATTGGAATTTTATCTTAAGTTGCA  
TTCACTTTGCAAATTAATATTGAATTATAGACTATTAGTGTATGGCGTGATGGCAAA  
CAAAAAATCAGTGTGTGATATTGTGGACTAGCCAAAAAATTTTCTGATGATTTTT  
TTGCCTAAATAATTTGAATTGTTGAGACCGAAACTCTTACTAATACTAACAATGT  
AACGCGACAAATAAACATTGTTGAGAATAAAATCTGAACCATCATAACTATAGTC  
TATAGTAACCGTCCGAATCAACCACATATGTATGATCTTTGCCATTTTTGATCATAT  
TTTCCGTTGCGTTTTCTTTGAATTTTCTCAATATATTTTTAGTGTGTTGATTTGACTT  
TTATCTAATTTATATAATTGTTTTCAAATGTTTCGCAATTGTGCGTTAAGTATTCG  
ACTCGAAGTAAACCCAGTTTCTTAGAATGGGCTAACTGCCATTGACCAAATCTTTAT  
CCGCGAAGAAAGATCTTTAGCAGCTAGGCTTATTTTATATCAACAAAAGTATATATT  
TATCTCTAACTAAATTCCTACAATTATTTCAAAAACATAGAAATTAATAATTTGAAAT  
GCCTATTCTTTTTGGTTATACATTGCAAAGGTTATGTATGTAATTTCTGATCTTGAA  
ATTTAAGTTCTTTAGCCCATATCTAGTTGATTTTACGAAATATTGTCGTTTACTCTC  
GTTTTTATATATAAAGCATGTACATATAACATATAATCAATGCTTCAAAAAGAAAA  
AATAATCATAACTAAATTGAAACGGGAAAATAATTTGCTTTCGTGTTCTATTATGC  
CAAACGTACTCACAATAGTCTTATCCTATCGACCCAAATTTAATCTTCCCAACTAC  
TTACTCCTAATTGAAACAAAATATAACCTTTCTTACTATAGCCTATATTTAAAAAAT  
ATCTATGATTTCTACATTTATATATATACGCACACGGCACATACCTCTCATTACCCAT  
ATATGCCTCTTAACAATCTCTCCACAGAACAAAAGCAAAAAGCCTAAACCGGGAT

---

P\_GPAT5

*Arabidopsis* 2153 bp Shih, P.M., et al., (2016). Nat Commun 7:13215.

TGATCGCAAACGTCAATGGTCTATATCCATCTCTTGGGGATACACCATTGAGATATA  
CACTTACTTCTTGACTGCTACGGAGCTGACTACGCCGTTGCAGACCTTCAAAAATTG  
GCGGTCTTCCAGCGATGGACCTTTCGTGTTTAACTCGGCCCTTGAACCTGACCC  
CTGTGAGCGTCCGGTCACTTATTCATGGATGGTGCCGAGGATGTACGGGATAGTG  
GGACGAAAACCTGGTATAGCATAGGGGATAAGAACTATGGTCATTGCGGAAAGATT  
GAGCATACTGATTAATAAGTGAAGAGGATATTGGTGACTTCAATGAAGACGGA  
TCCTGAGTATTGGAACAAGGTAAGTGTGTTGATATTTCTCATATTGAATTTAAC  
ATTTTGGGTGAGTTTAGGTTACATCTTTTTTTTTATTTTTGCTTTTGTGATAGGCAC  
CGAGGAGACAGTGTGTGAGGTGATGGAAGGAAAAGTAGGAAAAAGAAAAAGAGA  
AAGAAATGTTGTTAAGGATTAGAAAATGCAGATCTTTGGAGAAGATATAAAAAAAG

---



CGTTTTAATTAGAGAGATTTTTGCACATACAGATTTAGATTCGATCATTAGTTATTTG  
TTTCTAAATTCCTCAATTCCTAGTACCAAGAGAATGACGATTTTCTCTAGTAATACT  
GGCACTCTTCGTTTTTCAACATGTAAACATTACTTTGTATAAATTAGTCTATATCAAAT  
AAATAGTTACAACATGAACGTAACACTATTTATACACGAGGGTAAATTTTTAACAAATT  
TAAACCGAACCAAAAAGATTTTCAGTTAATCATAGTTTTGTTACAAGCGAAATCTGA  
AATATTCACCCTCAAGTTTGTACGTAATTGTCTAATCTGTGTTTTTTTTGTGCTAGTG  
TTATAATTGTTTCCTCGAATGTTAAGCACCACATAGAAGTATACACTTTTCTTTTATT  
ATTTTCGTTCTTCTCCATTTAGAACTTTTATTAATTCTACTGTAAATCCAACGTT  
ATTAGTTTATTTTCTCTGATGAAGTTCTAATTTTTTTTTGTTTGTGGAAAAAGGGTTA  
CTTTTCTGATGAAGTTGCCGATTTGTTTCCAACCAAACCTCAGCTAATATAGTTAGG  
GAGACGGATAAGAAATTGCATAAAGGGAGAGGCTTTGTAAACACGCAAGTTTACGT  
CAACTTGACACATATAAACTCGTATATAGGAATTGTGTA AAAATGTTAATCAATATAT  
GTTTATGAATATAGTCCTTTTATTTCTTAATCTATAGTCATGTTATCATCATATCGG  
CAAGAAAATTACTATTACAACATATGTTTCCGTGCTTCGATTTGTGCGATCAGGTAGG  
CAACCAAACCGGGCCAGATTAGTCACAAATGAAATTAGGCTCCACTTTGGCAAGTT  
TTTTCACAATTA AAAATTAGAAAGTCTAACCAAACCTAATAGAACTGAACCAACA  
AAAATGTTACGCAATTACGTAGCACTTCTCTATGAAATACTGTGGATAATTCGATT  
TGAGCTAATCTATGGTAAGTCGTTTCTCTCAAACCTGAATTAAGCTAAACCAAACCGA  
AAATAAACCGTTGTAGAACACCATAATAAACATATATATGTTCTCTACTCTTATTT  
GGCTATTTTTCCATTTGCAGATACGTGTGACAACATTCCAAATATAGGCACATGATA  
CAAATTACAAAGCCAGAAATTATAATTTATAAACTATACATAATAAGGTCAGTAGC  
CTAATTACATCCATATATTTAGTTGGGCATAATAAGGATAGCCTAATTTTGGTGCAT  
CCCGCCAAAATTCGGACAAATGGTGAATTTCAAACCATGAATTTCTTTGTATACA  
TACATTACGTGCACTATTACATCAAAGAAAAATAGTGACGTGCATAAACGTATTTTC  
TTCACATAATCTATATATAATATATACAGCCATGTACATTTTTCAACATAGAAAAAT  
CATGTATACAAATACGGTAGGTGCAATACTGATAAACTGCCATTTCCATTGCATTAG  
ACGCTAGTCAATCCAAACCTTATAACATAAAAAGTTATAGTCCATTTCTTTTCATATC  
CAATCGAGTCAAATAATATTCGAGCAAAAAACAAAAGA

---

P\_ASTF

*Arabidopsis* 2081 bp Shih, P.M., et al., (2016). Nat Commun 7:13215.

GGAGCAGGGTCTTCATCATTCACATGAAGATCAGCAGCAGAGTGCAGAGGAA  
AATGGTTCATAAAGCTCAAACCTTTAAATGGCTTTTAATTAGATATATTTAGCGAGA  
ATGTGATTGCTAGTGAAATCTCAAACCTTGATAGCTTATTCATAGCTTATTTACTTCG  
ATCAGCAAGAGAACAATGGTTCCTAAAGCTCAAACCTTTTTTGCCGTTTGCCTTAGA  
TTGTGCATACATAAAGTGAGAAGATGAAATATGGTTTTGCTGAAATCTCAATGTGCT  
CATTATAGTTTATTTTGGCTCGACCTTTCTTTAATCAATAGCTTTGATGTACTGATTA  
CTTTATAAAGTTAAGAAGTAAGTTCTGCTCTTTAACTGTACTGAATGGAGGCTTCT  
CTGCATAATTAAGCAAACACTCTGATGATTGAGTTTCGTTGTACAAAGGAAAGTTTT  
TGCTTAGTTAGAAATTCATCTTGTTTCTTTGCCAGAAGCTGGCTTGCTGATAGAA  
TTTGGACTACGCTACGTTTTCTTGGGTGAAAAACAATCCGCGTCTTCCACGAGAAC  
AGTGAAACTGTACGATGTTCTTATTGTATTGTGTCAACAGCCATAATCAATGAAAT  
GGGCCTCAATGACAGTATAAGCCGAAAAATATTCGAATGCGATCTAGAATAATCT  
GAAACCAAACCTTCTCAAATCATTAAACATTTGATTAGGGCCTAAAAGTCCATCCGTAT  
TTTTAAAAAAGTTGATAACAAATGCAAAAATACAAATATACATTACTATTA AAC  
TCAATCTTTCTGATTATATGTGGATGGAGAAGCTGTTTTGCAGTGTGGATTTGAATT

---

TTGAAGTTCTTGTTCAAAAAAGAAAAGAACTTGGTCAAGCTTCAAAAAGAAAAGAA  
GAAATAAAGACAAGTATACAAATACGTTGACTTCAATTAATATGAAGATAGAAGAG  
AAAGATATAGAAATGCGTTTTAAATTGGCGGTGGGAGATATGTGATTCCCTTGGTCC  
CGCTTTCTCGTTTGATTTCGGTAACCTAACCTTCTCCATCCAAGAAGACACAAACAA  
GGAAGAAATTAACCTACGTACGTACATCATTTGAACTACTTATATCTATTATAAATG  
GAAAATCTATTTTCTTCTCTCTCTTTTAACCGAAAAAGGAAAAGTCCTCGAAAT  
AACTCTTTAATATAATTCATGTGGAAACCTTCTATATATTTTTTGCATGCTTTTTTGA  
AATTAAGTAATGGCATACTAATTAGAAGAAGACGAAAAATAATATGTCTAAGTAAT  
TGAGTTTCGTGGTCAAGGCAAATCAAGATTGCATTCTTTAATTAAGTGTACAAATTA  
TGATGTAAGAACCGTTATTTGGCATAACCTAATATATATTTAAAACTGATTTTTTTTT  
TTTTTAACCTCTGTAAGAAATGGTTTTCTTAATTACCAATCATGATCTATTATTGTAA  
AATGTGTAATTTTGTGTTGCGATTGAAGTGTCTTAGATAAAGATATGTCATATGCA  
TGATATCATCTATTTGATTTTGAGAAAATAAAAACATAACATGAGAACATCGTAGA  
GAGTAAGATACATGACAAAGAGAAAAGAATAAGCTAAGAAGTCATCCAAAAATTGG  
GAGGCCTACTCTCAACTACCAAAAATACAAGTGTGTTGTGTTAGGTCAATTTATTC  
AGTCACCTAACCTAACTATATGAAATACGTTAAAATTCATATATAGAAAAATAAA  
GAAGAAATACTATTAGTCAATATAATTTTTTTTAAACAAAATAAAAATAAAGAAAGA  
AACACTATTAGTCAATGAATTAAAAAAAAAAAAAATCCATCTTTCGATCAAGACCGT  
CCAAGTATTCTCCTTTCACATAACTCTTACGTTTTACTAAACAAGACGAGATTTTT  
ATGAGCTTGTGGCTCCCAACAATCCTCATTGATTTCTCCATATATATCACATGAG  
AATCCAACCTCGACTTCATACTAACATTCATCCCAAAAGTTCCATTCTTTTTACAAA  
GCCATTGTGCTGTTTTCTCCATTTGGATCAA

---

P\_FAR4

*Arabidopsis* 2065 bp Shih, P.M., et al., (2016). Nat Commun 7:13215.

GGAGAGTTCTAACCCCGACATAAGGGATAGGGCAGCGGTGATGGACCTCATATTT  
AATATTA AAAAATTATAAAAAAATTGTTAGTGGTATAAAATACTCTCGAAAATATA  
AATACATTTTTTTTTGTCACAATAATACATATTTATATTTGCAAATATAGAATTTTAT  
TTAAATAACAAGACTAAAATCTTCTTTTTTTTTCCCTAAGGCTCTTTTTACAGTTGGGC  
CGGGGCTGATCAGTTCGCTATTGAAGTATACATGTCAAAGAAAATGAAGGAGAATA  
AACCATCGTATTAATTAATCGATTTGACTAATGAGACAACCTAATTCAGCTTTAAT  
ATAGTTTAAATTTTCGTACATGACCAGGTAATCAAATTTTCTAAACAAATGGAACAAT  
ATCAGATAGGGTAAACTGTTACCATCTGTGTAACCTTTGCAAATTAGTAAGTCTAAAT  
TATAAGAAACGATGACTTGTACTTCTAAAACCTCCAGCATATCATATAAAAATTTGAG  
GTTTGAGACATTTCTATAAGTTCAGATTTAATTCCTCCTAACGTATGAGGTTAGGTA  
TTTTCTGTCGCTTTACCAAAAAATTTGACGTTTCCCATACGTTTTAGCTTGTTATGTC  
ATTGTTGCATAATTTATGACCAACCAACCTAAGACCAAATCAGGTTTTTAGATAGT  
CCTTTTTCTCTTTGAAATTATAAGATGTTTTGGTTGATTGGCATAGATTACAAAAAT  
TACTCCCCCATTTTAGATTAGCTGTCGTTGAAGATTTTTACAGAATAATAAAAAAA  
CATTCAATTTTTCTGTTTTACCCTAATTAATGTATTGTTATATTTGATATCATCAATA  
AATACGTTTAAAAATGTTGATAAAATTGGAACTTTGTCAAACATCTGCATTGTAAT  
ATATAATCTAAAAAAAATGATTTCTTATATTCTATCAAATATGGCTAACTATACACA  
TATAATTTGGGCTGAGCTGTCATCTTTCGACATGAAATTACTCCGAATTATACATAA  
TTTGCCAGAGAAGTTATGTTACATAACAACACTCATATTCAAAGAAAACCTAGATG  
TATAATGTATTAGCTATTATTTAAGTAACACTAACAACCTAAATAAAAATAGAATGGAT  
GAACTATAAAAAATTAAGAATTATTATTGAATGAGTATATTTTTTTCTATTTTGGT

---

CAAACGTCGAGGTGGAGTTTAAGAAAATCGTGATTCTAAAATAGTGCAATAATGAA  
ATATTAATAAATCACGTTATCATCTTGTCTTTTATTTTCCACTATTTTCTCTGAAA  
TTTAAATGAAATATGTTATTTTCCAAAATGTTGTTACAACCGATTTACTATCTCATAA  
ATATGTTCTTTTGTGATTTTAATTTTTGTATTATTAATGTTCCCCTGCTTTTTGTGAC  
TAAACAACCTCGTACTCGTTAGATATATATTCACGTTGAGAAAAAGCGTTAACCA  
AAACACTTAGGTATATTGAAGAGTTCTAAAATTAGAACGCCAACCTTCCAAATCAA  
CACACCTACGACAATTCTAGTCCTACAACATAGATCCTTCTAGCAAACCACAAGGA  
AACTTCTTGTGGAAAACACTAACACTATCCTCACTCAGTTACTCTCGTATTGCTCTA  
CCTAGAGTTTCTAATTCTGCTATGTTATAAAAAATTCTTACATACTTATTCTTTTTTTTC  
TTTCTAAACATTCCATTGTTTTAAAAGCTAGGCCACGATTAGTAGTTAAAATATT  
TTAATTTTTAAAAATATGGGTTACATATTTTTTATTCTTTTTAGAGCTCCGAGATTTT  
AGAGCATGTTCTAATTGGATATGTGATATTTAATCAGAAGTAGTTTTAATATTGTTT  
TTTTTTATAAAAGAAAATGTAGGTAGGTTTACGTACAAGTAGTAGATATGATGGCT  
CAACAAAACGGGTCAACATTTACGGGTCTATATATATTCGTGCCTCATCGCCGAAG  
GTGTTATGGTTCAAAACAATCTATCGTACTTAGTTATTAATTGGATAGATATAAGTT  
TCTTC

---

P\_AtIRX5

*Arabidopsis*

1990 bp

Gondolf, V.M., et al., (2014). BMC Plant Biol 14:344.

GGAGATGAAGCCATCCTCTACCTCGGAAAACTTGTGCGAGAAGAAGACATGCGA  
TGGCATGGATGCTTGGATCTTTGACATTGATGACACTCTTCTCTCAACCATTCTTAC  
CACAAGAGCAACGGTTGTTTCGGGTAAATAAACTAACTTAAACATATACATTAGC  
CTTGATTCGGTTTTTGGTTTGATTTATGGATATTAAGATCCGAATTATATTGAACA  
AAAAAAAATGATTATGTCACATAAAAAAAAATTGGCTTGAATTTTGGTTTAGATGG  
GTTTAAATGTCTACCTCTAATCATTTTCTGTTTCTGGTTAGCTTTAATTCGGTTTA  
GAATGAAACCGGATTGACATGTTACATTGATTTGAAACAGTGGTGAGCAACTGAA  
CACGACCAAGTTCGAGGAATGGCAAAATTCGGGCAAGGCACCAGCGTTCCACACA  
TGGTGAAGTTGTACCATGAGATCAGAGAGAGAGGTTTCAAGATCTTTTTGATCTCT  
CTCGTAAAGAGTATCTCAGATCTGCCACCGTCGAAAATCTTATTGAAGCCGGTTACC  
ACAGCTGGTCTAACCTCCTTCTGAGGTTTCAATCATATTTAATAACCGCATTAAACC  
GAAATTTAAATTCTAATTTACCAAATCAAAAAGTAAAACTAGAACACTTCAGATA  
AATTTTGTGCTTCTGTTGACTTCATTTATTCTCTAAACACAAAGAACTATAGACCAT  
AATCGAAATAAAAACCTAAAAACCAATTTATCTATTTAAAACAAACATTAGCTA  
TTTGAGTTTCTTTTAGGTAAGTTATTTAAGGTTTTGGAGACTTTAAGATGTTTTCAGC  
ATTTATGGTTGTGTCATTAATTTGTTTAGTTTAGTAAAGAAAAGAAAGATAGTAATT  
AAAGAGTTGGTTGTGAAATCATATTTAAAACATTAATAGGTATTTATGTCTAATTTG  
GGGACAAAATAGTGAATTCTTTATCATATCTAGCTAGTTCTTATCGAGTTTGAAC  
CGGGTTATGATTATGTTACATGCATTGGTCCATATAAATCTATGAGCAATCAATATA  
ATTCGAGCATTTTGGTATAACATAATGAGCCAAGTATAACAAAAGTATCAAACCTA  
TGCAGGGGAGAAGATGATGAAAAGAAGAGTGTGAGCCAATACAAAGCAGATTTGA  
GGACATGGCTTACAAGTCTTGGGTACAGAGTTTGGGGAGTGATGGGTGCACAATGG  
AACAGCTTCTCTGGTTGTCCAGTTCCCAAGAGAACCTTCAAGCTCCCTAACTCCATC  
TACTATGTCGCTGATTAATCTTATTTACTAACAAAACAATAAGATCAGAGTTTCA  
TTCTGATTCTTGAGTCTTTTTTTCTCTCTCCCTCTTTTCATTTCTGGTTTATATAACC  
AATTCAAATGCTTATGATCCATGCATGAACCATGATCATCTTTGTGTTTTTTTTCT  
TCTGTATTACCATTTTGGGCCTTTGTGAAATTGATTTTGGGCTTTTGTATATAATCT

---

CCTCTTTCTCTTTCTCTACCTGATTGGATTCAAGAACATAGCCAGATTGGTAAAGTT  
TATAAGATACAAAATATTAAGTAAGACTAAAGTAGAAATACATAATAACTTGAAAG  
CTACTCTAAGTTATACAAATCTAAAGAACTCAAAAGAATAACAAACAGTAGAAGT  
TGGAAGCTCAAGCAATTAATTTATATAAAAACTAACTACACTGAGCTGTCTCCTT  
CTTCCACCAAATCTTGTGCTGTCTCTTGAAGCTTTCTTATGACACAAACCTTAGACC  
CAATTTCACTCACAGTTTGGTACAACCTCAGTTTCTTCACAACAAATTCAAACATC  
TTACCCTTATATTACCTCTTTATCTCTTCAATCATCAAAACACATAGTCACATACATT  
TCTCTACCCACCTTCTGCTCTGCTTCCGAGAGCTCAGTGTACCTCGCC

---

P\_CYP86B1

*Arabidopsis*

2163 bp

Naseer, S., et al., (2012). Proc Natl Acad Sci USA 109:10101-10106.

GGAGCTAAACACAACAAGTTTTTCATGAGCACAAATAGTGGATGTATATACAAGAAT  
TAATAACTTAGAAGGAAAAAACTAGAGCTAAACTAAAGACTATCGTGTGTGATGG  
TTCACAAATCCATATTAGAAATCAGACTTTGATTCTTCTGAGACAAAAAAACCAA  
CCTTGTATACATAAAGAGTTTGTAAACGTCTGCTTCAAACCTGCAGTTGCCTGGGTT  
CTTAGCAAATGTGGTACTCTTGGCAAGAACTCCAACAGCCTGCAAATGCAAAGTTT  
ATCAAATGAGCAACTTCATTAGAAATTTATCAATAAAAAACGAACTTTACGATTC  
CCCTTCAGCCTAATTTCAATTCTTCTAATCTTAATTCTATTGGTGCAAATCGAAAAG  
ACTAAATCCGAACAAAAAATTCAAACCTTCTTCACACCCAGTAAGAGATCAAACAC  
AGAAGCAAGAGATTCATTAACCTGCTGAAATTTGTTGAAAAGAGTCGCCATTTTTA  
GTTTTCTTTCCTCTGAAACGATTCTCCACGCTCTTTGTTTATAAGGATTGCAAGAAAT  
TACTGAAGAACATCAGGAATCGCGAGAGCTTGGGGCGAATCAAAAACCTCCATTGA  
TGAAGAAGACTGCATCTAGTACTTTACTTACTCGGTAGCACACCTCCATGGGCAGGC  
TCCAGCACCATGGTTGGGCCCATTTCTTATTAATGGGCCTAAAATAGAGCTTCTAGG  
GCCTCTATATATTTTGTCTTTTCTCTCCGTTTAGGCGTTTTGCTAACTTTCTTACGTA  
TATGAATGTGAATTATAGTTAGTTAACTTTAGAAGTGTGAGCGGCCAATGCCACGT  
CCTTTGTACGTAATTTATGTTATTCATGCTATTATTTATGTACCAATTTTCTATTCTA  
ATATATATTCTAAGTTTTTTTTGTATCAATACTAAGTATTTATACAATTTTTGCAAAT  
TTTGACAGAAAGATAGTACAAAAATATGAAAGACCAAAAACTACATAAACCACC  
AAAAATTACAACACAACAGAAAACGGAAAGAAAACCTCAATCGAAAACCTCTACAA  
GTAGAGACCTTAAAAGAACTTAGATTCCAAACCACAAAGCTCAAATATTTGTGTG  
GTTTCCTCAACTTAAAAGATCTCAAATACTTATAGTTGTTGCCACTAGCAATCCAAA  
CCTAGGCCAGTTTTCAAATCTCTAAAAAAGAGCTTACCATTCCAAACTTAGGACA  
ATCCTCATAATTTTTAAATTTTATGACATTTTTTAGTTTTTCTTACCGAACATAGA  
GATACAACGAATAACACAAAATACCAAATTTTACTAAACAAACAATTACTGCACAA  
ATGAAAAAGTAATCAACAACATGAGCTCATTTCACGAAAAAAGAAGCGAAAAAGC  
CAACGGTCTTGCCACAAATTAGTATATTGCAAATTACAAATGCTTAAAAAAATTCAC  
AGATATATTCATCAATTATACCTTTTGAATTATCTTGCAAATAAATCTTCCAATTCATA  
TTACCTACGTCAAAATTTAGCCATCTACCCTTATTATCCCATTATGAAAATTTCAAA  
ATCGATAAGATGACAGACACCCAACAACGAATTATCATTATATACTATAGGTATT  
AGATACCTACAATTTATTGGTTTATTGGGAATATACGATTCATAAATTCCTCATA  
AAAAATATAAGCAAATGTGGACGGAAGCAAAAAAACTAAATATAGAATGGAGAGA  
AATTGTATTATTAACCTTAGGTTACCCATCGCCAACAACCTCTCATTTCCTTCTAAA  
CTATTTACAATTTTGGTCAAAAACACAATCTAACCCCAAAAAAGATTTCGACCTTTG  
AAATTCCAAACCAGAAGCAAAACCCCAAAAAGAACCCTACTTATAGTGAAAGA

---

AAAGTAACATAATAATATATATACACGAGAACCAAGAGCCACTTGAATATAAAAGTT  
CACAGTTTTTGTCTGCTCACCAAATCAAACCAATTTCTCCTGATAGCCAAAGTTTTT  
GTCCCCAACAAAGAACTCATGCAACATTCTTCACCCACTAGCTAACTAACGACTTCC  
ATTCTTATTAATCTCTCTCAATTCTTCATTTCTGAGATTCATCGCTCTCTCTCTTT  
GTCAC

---

P\_CmRbc *Chrysanthemum morifolium* 1007 bp Chung, S.M., et al., (2005). Trends Plant Sci10:357-361.  
CTTAGACAAACACCCCTTGTTATACAAAGAATTTTCGCTTTACAAAATCAAATTCGAG  
AAAAATAATATATGACTAAATAAGATCATTTCGGATCTAATCTAACCAATTACGATA  
CGCTTTGGGTACACTTGATTTTTGTTTCAGTGGTTACATATATCTTGTTTTATATGCT  
ATCTTTAAGGATCTGCACAAAGATTATTTGTTGATGTTCTTGATGGGGCTCAGAAGA  
TTTGATATGATACACTCTAATCTTTAGGAGATACCAGCCAGGATTATATTCAGTAAG  
ACAATCAAATTTACGTGTTCAAACCTCGTTATCTTTTCATTCAAAGGATGAGCCAGA  
ATCTTTATAGAATGATTGCAATCGAGAATATGTTTCGGCCGATATGCCTTTGTTGGCT  
TCAATATTCTACATATCACACAAGAATCGACCGTATTGTACCCTCTTCCATAAAGG  
AAAACACAATATGCAGATGCTTTTTTCCCACATGCAGTAACATATAGGTATTCAAAA  
ATGGCTAAAAGAAGTTGGATAACAAATTGACAACCTATTTCCATTTCTGTTATATAAA  
TTTCACAACACACAAAAGCCCCTAATCAAGAGTCTGCCCATGTACGAAATAAATTC  
TATTATTTGGTATTGGGCCTAAGCCCAGCTCAGAGTACGTGGGGGTACCACATATAG  
GAAGGTAACAAAATACTGCAAGATAGCCCATAACGTACCAGCCTCTCCTTACCAC  
GAAGAGATAAGATATAAGACCCACCCTGCCACGTGTCACATCGTCATGGTGGTTAA  
TGATAAGGGATTACATCCTTCTATGTTTGTGGACATGATGCATGTAATGTCATGAGC  
CACAAGATCCAATGGCCACAGGAACGTAAGAATGTAGATAGATTTGATTTTGCCG  
TTAGATAGCAAACAACATTATAAAAGGTGTGTATCAATAGGAATAATTCCTCAT  
TGGATTCATAGAAGTCCATTCCTCCTAAGTATCTAGAAA

---

P\_HSP18.2 *Arabidopsis* 915 bp Takahashi, T., et al., (1989). Mol Gen Genet 219:365-372.  
AAGCTTGCTGCAGCTTTGACGACAAGTAGGTTTGTTCATTTAGTAGCATCTTTACAA  
TGTAAGCTTTTCTCTTCATTTCTCTTTCTTTCTTTTCATGCAAGTTCTATTGATT  
AGAAACCAAACCATGACATATCACATTTTCAATTTTTAACCCCAAGTTTCCAAAA  
AGGTAATCACAATTACTTCCATGGTCATTTCTTCTGGTTCAAGCATGACATGAACA  
GGCAATAAATAAGTTGAGATTTTGATCACAGTAACTGATACTTGAATCGAATCATT  
AGATTTTTTTTTTTTTAGTTTACTTGTAGTAAATATGTTGTCTATGTTTGTACAA  
AAACGTGGCTCAGTTCTGTATATATGGAGACAAAAAATCCATTAAGATTGTT  
GACATTTCTCGGAAATTTAGTGCCAACTGTTATTGCGGAACTTACTATAGTTTTCT  
TTGGCGAAAAGCTAATAATCTTAAATCTTGATTTTGTCTCTTTTCTCTGAGTTAGAT  
TTTCTTAAATTCCTTCCGACCTATTAAGAAATGGGCTTTTGCAAAGAAGATCCGC  
TTCCTGAGCCCGTATCTCGAAGAGGATAATACAACAACAAAGCAAACGGCACGT  
AGTTTTAATTGTAACCAAGGATTGCATTTTCGGTCTTGTTCACAAACGAACTTCC  
TGAAATGCCAAGAAAAATCTGGTCATTTACCACAGTGATCATTGTGTATGTGTTCT  
AAAGACTCCAAGCGAAGTTTTAGAAAAAGGAGCATTCTTATTCTATTCAAGAAA  
CTCGAAGAACATTCTCTCTTCATCCTCTAACTTCCCTATAAATATGTCCTTTGCTAAT  
CAGATCAAATCAGCAGGAAAAATCAAGAACCAAAAAGTCTCCCGAAAAGCAACGA

---

P\_AtRD29A *Arabidopsis* 1525 bp Bihmidine, S., et al., (2013). Planta 237:55-64.

GGAGAGATTGGGGTTTTGCTTTTGATGTTTGTGTTTTTGTATGATGCCTCTGTTTGTG  
AACTTTGATGTATTTTATCTTTGTGTGAAAAAGAGATTGGGTTAATAAAAATATTTGCTT  
TTTTGGATAAGAACTCTTTTAGCGGCCCATTAATAAAGGTTACAAATGCAAAATCAT  
GTTAGCGTCAGATATTTAATTATTCGAAGATGATTGTGATAGATTTAAAATTATCCTA  
GTCAAAAAGAAAGAGTAGGTTGAGCAGAAACAGTGACATCTGTTGTTTGTACCATAC  
AAATTAGTTTAGATTATTGGTTAACATGTTAAATGGCTATGCATGTGACATTTAGACC  
TTATCGGAATTAATTTGTAGAATTATTAATTAAGATGTTGATTAGTTCAAACAAAAT  
TTTATATTA AAAAATGTAAACGAATATTTTGTATGTTTCAGTGAAAGTAAAACAAATTA  
AATTAACAAGAACTTATAGAAGAAAATTTTACTATTTAAGAGAAAGAAAAAATC  
TATCATTTAATCTGAGTCCTAAAACTGTTATACTTAACAGTTAACGCATGATTTGAT  
GGAGGAGCCATAGATGCAATTCAATCAAACTGAAATTTCTGCAAGAATCTCAAACAC  
GGAGATCTCAAAGTTTAAAAGAAAATTTATTTCTCGACTCAAACAACTTACGAA  
ATTTAGGTAGAACTTATATACATTATATTGTAATTTTTTGTAAACAAAATGTTTTATTA  
TTATTATAGAATTTTACTGGTTAAATTA AAAAATGAATAGAAAAGGTGAATTAAGAGG  
AGAGAGGAGGTAAACATTTTCTTCTATTTTTTCATATTTTCAGGATAAATTATTGTAAA  
AGTTTACAAGATTTCCATTTGACTAGTGTAATGAGGAATATTCTCTAGTAAGATCAT  
TATTTCTACTTCTTTTATCTTCTACCAGTAGAGGAATAACAATATTTAGCTCCTT  
TGTAATAACAAATTAATTTTCGTTCTTGACATCATTCAATTTTAATTTTACGTATAAAA  
TAAAAGATCATACCTATTAGAACGATTAAGGAGAAATACAATTCGAATGAGAAGGAT  
GTGCCGTTTGTATAATAAACAGCCACACGACGTAAACGTAAAATGACCACATGATG  
GGCCAATAGACATGGACCGACTACTAATAATAGTAAGTTACATTTTAGGATGGAATA  
AATATCATAACCGACATCAGTTTAAAAGAAAAGGAAAAAAGAAAAAATAAATAAA  
AGATATACTACCGACATGAGTTCCAAAAGCAAAAAAAGATCAAGCCGACACAG  
ACACGCGTAGAGAGCAAAATGACTTTGACGTCACACCACGAAAACAGACGTTTATA  
CGTGTCCCTTTATCTCTCTCAGTCTCTCTATAAACTTAGTGAGACCCTCCTCTGTTTAA  
CTCACAATATGCAAACTAGAAAACAATCATCAGGAATAAAGGGTTTGATTACTTCT  
ATTGAAAAGAAAAAATCTTTGGA

---

P\_AtRD29B      *Arabidopsis*      649 bp      Bihmidine, S., et al., (2013). *Planta* 237:55-64.

GCGTAATTTTCTAGATCCGCTTGGGAGCTCAGACTGTATCAGTGATGATGATGATGA  
TGAAGAAGAGAACGAATTTTAAAATTGGCGTTTTGAATTTTAAAGAAATTA AAAA  
TATCCCCGTCGATTTCAAGAGGGAGATGGAGATACCAAAGCAACTCTCGCCACTTGT  
CGTCTTTTAATTTAATTGAGTACGTTATGCCGTTTTAAATGTTCAAACAGCACACA  
GTTGATAGCTGAATTGATTTTTCTTTTGGCGTTTTGTTATATTTAAACAACACACAGT  
GCATTTGCCAAATAACTACATGATGGCCAATAAACGTGGACCGACTAAAATAAAT  
AATAGAAGATACATCGATAGGCTTCTCTAAAGATCGGATAAAAGATAATGTCGCATA  
GCCACGTAGAGAGCAACTGGCTGAGACGTGGCAGGACGAAACGGACGCATCGTACG  
TGTCAGAATCCTACAGAAGTAAAGAGACAGAAGCCAGAGAGAGGTGGTTCGGCCAT  
ATGTCATCGTTCTCTCTATAAACTTTATGGAACTTTGTCTGATTTTCTCAGAGACACG  
AAAAGAAAGAAAACAACACTAGAACAAGAGGGTTTGATTGATTCACTTGAAAAAG  
AGAAAACACAGCTTTGGA

---

P\_MpUbiC-4      *Marchantia*  
*polymorpha*      2500 bp

GTATGAATCATTGTAGAGACTTGATTCCAGTGGACCTACTATACCTAACAAACGAAA  
AAAACAGAACTCAGTCCAATGGAGCTCATGAAACCCTTGCAAACCTCTTTTAGTGAA

---

AGTTTGAAACTTTGAAAATCACCAACAACTATCCACAAATTTCTTGAACTTTGGAG  
ATCACAATTTTGATAATTGCAACAAGCTTCCAATGATCAAAACGACAACAAGAAAG  
AAAGACAAAATAAAAAGTGAGACTTGAGCTTTAGTTTATCAATTTATTTTGAAATGCAT  
CTTGTACGATAATCATTAGTAGGTTATTGGGAAACACTTAAGCCTCAAAAGTACTCT  
CATAGTAGTACTTCGTCCAAATAGGGGCAATCACTTTCTACACATTATAGCCGTCAAC  
TATCGAGATACAAAACTCGTTTTGGAACATGGTTGACGTAGGAGTTTTGGAGGGTC  
TTCTCGTTTTGAAAAAATTCATGTTGGGTCCTAGCAAGTGTTTTGAATTCATTGTGTCT  
TATCAATTTGTCTATTTCGTTTGTATCTCTATTAATATGTATGAAAATGAACTAATCT  
AGATTC AATTGATGCTCATTGATTGAATGCTCATCGAAGGAAGAGAAGATATCTAT  
ATATTATAACCAGAAATATGATCGTGATGATGGCGAGTGAGAGTGATTCCCTCATT  
CTGAGTTAGTGCTAATATACATTTTAGTTTTATCACGTTAAACACATATATTCTTGTTA  
CAAGAGGCCCAAGTTATTGTTGCAAACAGGGTGATTATTGTAATATATATAACAGA  
TATAACGGAGATTGCTACGGTAGAAACCAATGTCTCAAAGTTTAAATATATGGTGAG  
AGTTAATCTCCTTGGTTTTTTCTCTAAAGATATAGAATTTTATGAATGCAAGATTTTA  
CCACATTTTATTAATCTTTTTAAACAACATGTTTCCATTTTTTACACATAACACTAGC  
GAAATACCGTAGAGATCAGGTTAGATCATGAAACATCACATGATCTATTTGTTTATAG  
ATTTTATATCTTGATCATGTGGATCTTTTAGCATGTCTTTCTCATTACTTCTACCTACA  
GGTAAATATCATATTTGTA TACTTGTATGGGATTTTTCAATATCCCTTGCCCCATTCA  
AAAATAACATCAATCATCATGCCTGTATACATAACACATTCTTCTTGCCCCTCGCATGC  
TTGCACGATGTTTGCCACCCACAGCATTGCGAAATATAGAATGTTGCTGTGAGATAA  
GTATTTGCATATGCAACATTCCATTGCCAAGGAGTCACGTATTCCAGCACAGGCCTTG  
TGGGAAAAAAGCCGGACATGGACGCTGCACTCCACATGTGATCAATATTCAC TTATA  
GAAATTATGCATTCGTTTCCATATCCGAGAGAAGAGTGCAGAAACGTACCAGCCCG  
TGCAATCTGCCAAGCCCGACGAGTTGCATGTAGAATGCACTGAGTGTCGTA AAACCA  
CTGTAATGATTTGTTAGTACCATGTGTTTATTCCCCAGAGTACCAACGTGTTCAATAC  
GAAGTTGAAATGACATTCTGCCATATAAAGTCACCATCGTAAATATAAGGAACCAT  
AATGAAGGTACTAAATTACACTTTTCAAGAGTACGTACGAGCGCTTTTGAAATGTTTG  
CTGTGCGTCTGCCAATCATTCGTATGGAGAGATGAGGGTCTCTGGGTCCTTACTT  
ACCATTTGATTCGTTCTAGATTAGGCCTCATTCTCGTGAACGAAATAATAACAACCGC  
GCGTATCGATTGGGTGGTGGGGTGTACTCGTGCTCAGCCACTGGAGGTCAGTGGGCG  
TGCTCATCATGACCCGGAGAAAGACGAAATTCGAGCGTTCATGAAGACATTCATGCA  
CACAAGGAAGGACCTCGCAGAAATATCTGGACGAGGAGCTGAGCCCACAGGAATTT  
CAGGCAGATTTCCAGGAAGGTGAAGGCCGACCCGCTTTCGAAGGAAGGAAGGAAGG  
AAGGAAGGAAGAATGACTAGATTGTTCCAAGTGAACAGAGCGCGAGATGCATCATG  
ATTCTCAGGCTGAGGAGAATAGGACAGAGTAATAGTAAAAAATAGGCTGCCAGTG  
GTAAATGATCGCTCGTCTGTCTGGCCATCTCTGCCTGTCGTGTGTACCGTCGTCGTC  
ATTCATCGAGCAGCGAAGACTTGGAGAACAAGTTGAAGTCATGATTGACCCTACCCG  
GGCGGTCACAAACGACGGGGTCTTTGTTGTATAAGTACAGGGGCTGGGAATTGTA  
GTTTACGCGTTTCTGATTGTTGGTTATCATCGACACTGCTTCTCCAGCAGTACTTCTA  
CTACATAGAAATTTACGTCTAATAGTTTCGTTAATTTTGTTTCGTGGAGCAGGCAGAG  
TACTGTGATTCCATTTTCGTTTCGTTGGATTGATTGATTGTCGTCCTAGTTGGAAAGGAA  
GTGAGTGAGAAGAAGAAGGATC

---

|            |                   |         |
|------------|-------------------|---------|
| P_MpUbiC-2 | <i>Marchantia</i> | 2494 bp |
|            | <i>polymorpha</i> |         |

---

---

TCGCTGTCCAGAGACACTTTTACAATTACATCCCTTAACATATTTTGGTTGAAACCTGT  
GTTTTACCTCATAATAAATTGATTGCGAGACTACATGATCCATCCGTTAGGACAGCAC  
AATTATCTACCATGTTGCACAAAAGAGGAAGAACTATACTTCTAAATTTGGTACAAC  
AACCAATGATGAATGGAATAAAATATACACAATTTGGTGAGAACGTTATTGATAGAA  
ATAACTTATCTTCATGATTCAAAGTCTCCTGCAATCCGAGAGGAATCGACAACCTGAA  
GACAACCTGAAGGGATCGGATGCTACGAGGATAGTTGGTGGCCTGTTCTACCCAGCT  
GGCAGTGTGACATGTTGAACACCAATTATATATCATATGATATTATTCTATCGAGCT  
GAACGGTGAAGGAAACGTGGCCTGCTGCTAAATAAGACACCCACAATCTTTTCCCC  
AACATGACGGCAGGTCTGCTGAGTTATCGGCAAGGACGACCGGGCAGTCCGGGCAG  
CCACGATAAAGACGATCCAGGAGCCTGTACAATACGATAACTTTCGAAACAAGGTCC  
AGGAAACAAGGAATCTTCTCTTGACTTCTCAACCTGAGCCTCAAGCTGTTCCATGAC  
GGTACTGTACTGTTCTGGAACGGAAGAGAGATGTTAGTCGTCAGTTGTCAGTGTTCGA  
AAAATTCGGTCTTTCGGTGAAGATTCTCGAATTGGCTGCGATTTCAATTGTCAGAGTT  
TCTTGTGAGGATTTATGTACGCCAAGGTTTACCTCCTTCACTATTGACGGTGGTAAG  
ATTCTGTGGAATATATTTCTAGACAAGGTTGAAACTTTTTCTGAAGCTTTGTTTTCTT  
CGACAAAAAGTTAGTTTGGTAGTCGAAGTTGATGAGATTTTGAGCGACATTTTCCAAA  
TTTGTCTTATGTCATGTCACACTATCTTTGGATGTCACCTGTTAAGTAAAAAGTCTGACAA  
AATGTCGCAAAGTAACATGGATACATGCATTATCCTATACAGAATATATATATTTTCA  
TTAAAATCACATAAATTAATGATACTACACTTTAGATGACGTCTCTTTGCCCAACTT  
CTATGTGGGTGATATAAACAATTTTTCTTGTCCGTTCCAGGACCTCAAGTCTAGA  
ACGCTTACAAAGAAAAATTTACCCTAAAACCTCACCTGAATCCGATAATGTAGATTC  
AAGGAAATGACGAAGGCGGGCTAGGTAAGATCAATTAGGATTAGAAGACCAAATCA  
ATGAAGAAACCGAATAGAAACCAAGGGCTTCGCTCCGATTGTATATTGAAGTGGAGA  
ATCGAAAGCATGATAACACAGGATTTGGAATTAACATCGATCAGTGTGCTAGACC  
GCATTCTGGAAACCCGGATCCTTAGGTTCCATTAAATGGAATGTGGGGAACGCAGC  
AATGTACAATTCTTCTAAATTAACACTAACTACACGTGGGATTTTCAATCTCACTGA  
TACAAATCCATGTATAATTACTACAGTCCAGATCATCCAGGTGCGGAAAAGAATTGC  
AAAAGAGAACTCCCCCTCTCCCCTCCCATCCCCTCCGACTCAAAGTCACGTACGCC  
TCAGTTTACGCAAAATCACCAAGAGCATTTGAACCAGTAAGAACCGTTTGTAGTAGC  
CTATCCGTTCCACTAAAATAACAACAACGCAGAAATGGCTATTTTTGTAGTTCTAAT  
TTTGTCTTAACTATATATCTTTAATTTTGGGACTATAATAACGAATAGACATTAAC  
ACTATTCCATTATTATGCGGCATGTCCACTAAAATAACAACAACGCGGAAAATGGTTA  
CTTTTGTAGTTTCAAGTTTTTGTGCTTAAAGTGAATATTTCAAATTGTATATCTTAAG  
TGTTGGGACTATACTAACGATAATACATAAAAACCTATTTTCGTATGGAACCATTTA  
GGCGACATTTTTACCGATACGATGGAACATAACCAGAACGTACAAGAAAGAGAGAGA  
AGAACGTGGCCCCCGTCCAGGCAGGGTGCCTGACCGGCAAGCAGAGGGGGAGATGA  
GGAAGGTGGGGTGAAGTGAACCGGAGTGACGGCAGAACCGGTCCCACCAGCAACG  
TCACAGCGGGCAGAAGGCGAAGTTGAAGGCGAAGTTGCCGAGTACCGTCGGGCGGTC  
AGTGTGTCAGTCACTCAGTGGACGAGTGTGTCGTCGTGATCAGTCTCGGTCCGGAGGGC  
AAAGGTTCGGGCAGACGGCAGAGCTCGGGGCAAGGGAAGAACGATATAAAGAGCATG  
AAACGCCACCAGATTTACATTCCTCTCCTCTCTCCCTCTCTCTGTCTCCTCCTCCTT  
TCTCTCTGATCTGTTGTTTCGGCGCGCGGCTCCACCGTCGCTCGATCCTCGCCGGG  
ACACGGCCCTCGATCCATTGCCGCCCTGCTCGTGCTCGCTCGATCTGTCGTTTCGGTTGT  
CGTCGGGAGAAG

---



---

P\_MpUbiC-3      *Marchantia*      1500 bp  
                         *polymorpha*

ATAGAGTTGATCGAGAGATTCATGCCCGTTTTGAAACAGTGAGTAAGATATTAAGAA  
TTATAATTTGTTATCTACTTGTGGCCACGTTGGTGACACGCTGTACCAGTACAGGTGCC  
GGTTGAATACTATTTTAGCATGGGACGTACTTTTGACAGACCGTCGCTTGATTTTGGT  
CCACATTCAATCAACTACATCTGAGTTGCTTCATTAGCAGTGGCCGGTAGCGCCACC  
GGCCACCAATTTCAATGTTTCAACTAAGTCTCGTTCGGGGTTTTCTAAATTATCTAGA  
GTTTCGAGCTAAATCTACAGCGGAATAAGTCACGACAGTTTAGAATAAGAGTCACT  
ACAATTAGTAGAGCGTTTAGGGTCTAGATTACTTGTATTTGAGCTACAATATTGTTTTT  
TTGGCGTCATTGTCTGCATCAAACGTGACACTCAGAGACGTGGATGAGGTTGTATCAT  
TTTTCCCTTTGTGTAAAGTTTATAAGTTGTTTTTTTCGCGGGCATATGTTGCATCAGCCC  
GCTTAGAGTCAGATGATGATTAGATCCCAAATATATTATGTGAAATAAATTGATCCAA  
AAAAGTGTTTGTAAACCTACATCTTAGAAAAAAATTATACATGTTTTGTATCCAA  
CTAATAGATCCACTTTTTACCAATTATAAGGAAAAAGGCGCAAGTAAAATTATCCAT  
TTCAAGATGCAAAGCAAATAAACCGTTCACTTCCGCTTCTGCACATATAACCATAACAT  
GACTTGCTAGTGGGCTTGGCGTGAAGCAAATACTTGCTACTATAGTCGGGCTTAGGAA  
CAGCAGAGTATGAATCTGGAATAAACCCACGGGGGAGCCCTAAAACCTTTGATTTAG  
AGAACTTAGGAAGTTCCCAGCTGTAGACTTGCGTAGTGCGACTTCTGGCCATGCCTAC  
TGTAACCTCCTTGTACCGTTCACGTTTCGACCATTTCTCATGATCAAAGAGTGGATCAC  
ATGAAAAAATGAGCAAATGATAATACATAATATTGTATCGCTGGTTTATTAAGGAG  
AGTCAACTACTGTGCGCTGGAGCGGAGCATCATACGGCGGAGTCGTAGGCAGTTACT  
GAACCGGAGCTCGTGGTGACGCTTCTCGTGGTTACTTGAGAAGTTTAACCCATCGTCA  
TCCGGTTGCAGTAACTCACAAGTGGTCTGTTCGGCAGCGGTGACTCACGGCAAGGTCC  
AGGCGGGAGTCATGATTATCTGCATGTGGTGACGGCATGAGCTGTCAGCAGCTCGAG  
GACCCGAAGAGCTATAAAGAACACCCGCTGGTCCCTCATCTCCTCATCTCCTCATTCTG  
GTCTGCTTCTTCTTACCTCACAGCTTCATCTTCTTTGCTCGTTAAAAGTCTATCTTTC  
ACGTTCCCTTCTTCATTCTGTTTCTACACTTCTTCTTCTCGTCCGTTTGTTATTCTGTAGTG  
TTCAGGAGGTGCACAACAATTCCACTTGGGGCCCCGGTGCCTCCGCCAAG

---

P\_MpEFla-      *Marchantia*      1729 bp  
5'UTR            *polymorpha*

CAAATGAGTCACACACATTGTTGAGAGACATATCAAAAATAACTCAATTGTAAGGTAA  
GTTGATAGATTTCCAGTTAAATGCATTATTTAACAATATTTGTATCTCAAATTTTCA  
AAATCATATCAAATTTGCAGATCTTGATGATGATTCACAACCTCTGTCTTCGATTTTGA  
TTGTTAACGGGTATCGATATTTGGGTAACCTAAAAAGAATTTGCTAAAGATCTTAAAA  
AACAGATTAACAAAACCTTTCAAATAGCTAATCCTTTAAATCCGTTTACAATATAA  
TGCTCATTGATGATAATCGAAAAGATTCCATTTTAAAGTGCATATAAATTGCTTAATT  
ATCTCTTCTGTCTCGTAATATTTTGTCTCTCCTATTGGATCGGACCCGCATCTTCTCG  
ATCAGTTCATACTAATAATTTGGTCAACTTCAAGAGAGATTAGAACTTCGTTCTCC  
AAAGTGTAAGGCCGACAAGCAGAAAAGGAACTTCAATCAGAAGCCTTCTAGGTTT  
TCCCGCTCCCAAAAAGCGAAGGGAGGACGGGGAGGACGGTGAGGCCAGAAGAAGA  
AAGCAACAGTAAAATCTCATGTGATTGCGTGCATGTCATGGATCTATGGGATGCTAGT  
CCACCGTTTGGAAAGTATGTGCAGAAGGAGAAAGGCGCGGGAGGCCAAAAGCGACTT  
CGGCCACCTCTCTACTTTCTAGAAAAGTTGCTCGCAGCTTGAATAAGCGCGGAAAAG  
GTACTCGAAAACCGGAGCAATCGGTGTGGTATCAGCAGTCGGGTTTCGCTAAACCTA

---

CGTCTTCTTATTTTGGGAATGTAAATTGAAAGGGCGTGCCGGCCCTAAGCACGGACGA  
TGTGACAGACGGAGGAGTGTGAGCAATTCGGATGACGATGCTGGCCGGCAGTCACGA  
CAAAGAGTCCGAAGGGGCATGGACAGGGCAATATATAAATGGAAAAGAGGCTTTGA  
ATATTCCTAACCCCTTCGTCGTCGGCCTCCCAACTTGCCCTCGCATGCTGAATTGGCCGC  
CTATCTGCGAATGGCCGGCCGCCGACCCTAAGTCGAATAACTTGAACGGAGCCGAT  
GCAAAGTCCTTATCGAACGCTCGTTATTATAAACGGGGCAGACCTAGGTATTTAATTA  
TATCAAAAACCCCTCCGCAATTCGCTAATCATTCCCTAATTTCTTCTACTTTGGCGTCTA  
GTGCTGTGGTCGCGCTTGTCTCAAAGCTCGCTGGGAGGCAGTGGAGCGTCTGGCTTA  
AAATCGATCGCCGCAACCCTAGAGTTCCTTTCACTTCTTTCTCTTTGCGTGGAGAGC  
ATCGACATCGAAGAGCTGCATCTTGTCTTCTGGTATGCGCCTTGTGCCCTCGTCTCTGT  
ACGTCGTTACGATTGCTCGATATTGTGATTGTCTAGACCTGAAACCCGACTGGAGCTT  
TTACGTGGTGTGATTGGGGCCTCGAGCGAGTGATTTTTTAGGTTGTTTTAGCCAAG  
TACATCCCACTTTGGTCAGTCCTGTTATCTCGGTAAGGTGTTTCAGTTCAGTCTCTGGTG  
CGGAGGTGCCTCGTAAGTTTCCTGCATGATAGATTTGTCTATCCTTGACTTGAAGAGG  
AGTCGAAGGTCAGCGAGGTTGGCTGTGTGCTATGGACGTCGGTGCTCCTTGTTCCGT  
GCTTCTATGGGTGTTGCCTCAACAGTATTGATGTGCCTGCAGAAAGGTTG

---

P\_StGBSS      *Solanum*      857 bp      Ni, M., et al, (1995). Plant J 7:661-676.  
*tuberosum*

AAGCTTTAACGAGATAGAAAATTATATTACTCCGTTTTGTTTCATTACTTAACAAATGC  
AACAGTATCTTGTACCAAATCCTTTCTCTCTTTTCAAACCTTTTCTATTTGGCTGTTGAC  
AGAGTAATCAGGATACAAACCACAAGTATTTAATTGACTCATCCACCAGATATTATG  
ATTTATGAATCCTCGAAAAGCCTATCCATTAAGTTCTCATCTATGGATATACTTGACA  
GTTTCTTCTTATTTGGGTATTTTTTTTTCTGCAAGTGGAAACGGAGACATGTTATGTT  
GTATACGGGAAGCTCGTTAAAAAAAAAAAAATACAATAGGAAGAAATGTAACAAACA  
TTGAATGTTGTTTTAAACCATCCTTCTTTTAGCAGTGTATCAATTTTGAATAGAACC  
ATGCATCTCAATCTTAATACTAAAAATGCAACAAAATTCTAGTGGAGGGACCAGTA  
CCAGTACATTAGATATTATTTTTTATTACTATAATAATTTTTAATTAACACGAGACAT  
AGGAATGTCAAGTGGTAGCGGTAGGAGGGAGTTGGTTTAGTTTTTAGATACTAGGA  
GACAGAACCGGAGGGGCCATTGCAAGGCCCAAGTTGAAGTCCAGCCGTGAATCAAC  
AAAGAGAGGGCCATAATACTGTGATGAGCATTCCCTATAATACAGTGTCCACAG  
TTGCCTTCCGCTAAGGGATAGCCACCCGCTATTCTCTTGACACGTGTCACTGAAACCT  
GCTACAAATAAGGCAGGCACCTCCTCATTCTCACACTCACTCACTCACACAGCTCAAC  
AAGTGGTAACTTTTACTCATCTCCTCCAATTATTTCTGATTTTCATGCA

---

P\_StUbi      *Solanum*      1197 bp      Ni, M., et al., (1995). Plant J 7:661-676.  
*tuberosum*

GGAGGGAATCTAATACTTACCTCTTAGAAATAAGAAAAAGTGTTCCTAATAGACCCTC  
AATTTACATTAATATTTTCAATCAAATTTAAATAACAAATATCAATATGAGGTCAAT  
AACAAATCAAAAATAATATGAAAAAGAGCAATACATAATATAAGAAAGAAGATTT  
AAGTGCATTATCAAGGTAGTATTATATCCTAATTTGCTAATATTTAACTCTTATATT  
TAAGGTCATGTTTCATGATAAACTTGAAATGCGCTATATTAGAGCATATATTAATAA  
AAAAATACCTAAAATAAAATTAAGTTATTTTTAGTATATATTTTTTTACATGACCTAC  
ATTTTTCTGGGTTTTTCTAAAGGAGCGTGTAAGTGTGACCTCATTCTCCTAATTTCC  
CCACCACATAAAAATTA AAAAGGAAAGGTAGCTTTTGGCGTGTGTTTTGGTACACTAC  
ACCTCATTATTACACGTGCTCATATAATTGGTTAACCTATGAGGCGGTTTTCTGCTA

---

GAGTCGGCCATGCCATCTATAAAATGAAGCTTTCTGCACCTCATTTTTTTCATCTTCTA  
TCTGATTTCTATTATAATTTCTCTCAATTGCCTTCAAATTTCTCTTTAAGGTTAGAAAAT  
CTTCTCTATTTTGGTTTTTGTCTGTTTAGATTCTCGAATTAGCTAATCAGGTGCTGTTA  
TAGCCCTTAATTTGAGTTTTTTTTCGGTTGTTTTGATGGAAAAGGCCTAAAATTTGAG  
TTTTTTACGTTGGTTTGTATGGAAAAGGCCTACAATTGGAGTTTTCCCGTTGTTTTGA  
TGAAAAAGCCCCTAGTTGAGATTTTTTTTCTGTGCGATTGATTCTAAAGGTTAAAAT  
TAGAGTTTTTACATTTGTTTGTATGGAAAAGGCCTAAAATTTGAGTTTTTCCGTTGATT  
TGATGAAAAGCCCCTAGAATTTGTGTTTTTCTGTGCGTTTGTATCTGAAGGCCTAAA  
TTTGAGTTTTCTCCGGCTGTTTTGATGAAAAGCCCCTAAAATTTGAGTTTTCTCCGGCTGT  
TTGATGAAAAGCCCCTAAAATTTGAGTTTTTCCCGTGTTTTAGATTGTTTGGTTTTAA  
TTCTCGAATCAGCTAATCAGGGAGTGTGAAAAGCCCCTAAAATTTGAGTTTTTTTCGTT  
GTTCTGATTGTTGTTTTATGAATTTGCAG

---

P\_StPat

*Solanum*

1737 bp Ni, M., et al., (1995). Plant J 7:661-676.

*tuberosum*

AAGCTTATGTTGCCATATAGAGTAGTTTGTGATGGTATACTTCATAAACTTTAACTTA  
TGTTAAATTTGTAATGATAAAAATTTTTATTGTAATAAAAATTACTTATAAAATTTGG  
GCATTATAACATATGAAAGACAAATTGTGTTACATATTTTACTTTTGACTTTAATATG  
AATATTTCAATTTAAATCATTGTTTTATTTTCTTTTCTTTTTACAGGTATAAAAGGTG  
AAAATTGAAGCAAGATTGATTGCAAGCTATGTGTCACCACGTTATTGATACTTTGGAA  
GAAATTTTTACTTATATGTCTTTGTTTAGGAGTAATATTTGATATGTTTTAGTTAGATT  
TTCTTGTCATTTATGCTTTAGTATAATTTTAGTTATTTTTATTATATGATCATGGGTGAA  
TTTTGATACAAATATTTTTGTCATTAATAAATAATTTATCACAACTTGATTACTTTC  
AGTGACAAAAAATGTATTGTCGTAGTACCCTTTTTTGTGAATATGAATAATTTTTTTT  
ATTTTGTGACAATTGTAATTGTCACTACTTATGATAATTTAGTGACATATATGTCGT  
CGGTAAAAGCAAACACTTTCAGTGACAAAATAATAGATTTAATCACAAAATTATTAA  
CCTTTTTTATAATAATAAATTTATCCCTAATTTATACATTTAAGGACAAAAGTATTTTTT  
TTATATATAAAAAATAGTCTTTAGTGACGATCGTAGTGTTGAGTCTAGAAATCATAAT  
GTTGAATCTAGAAAAATCTCATGCAGTGTAATAAACCTCAAAAAGGACGTTGAGT  
CCATAGAGGGGGTGTATGTGACACCCCAACCTCAGCAAAAGAAAACCTCCCTTCAAC  
AAGGACATTTGCGGTGCTAAACAATTTCAAGTCTCATCACACATATATTTATTATATA  
ATACTAATAAAGAATAGAAAAGGAAAGGTAACATCATTAAATCGTCTTTGTATATT  
TTTAGTGACAACCTGATTGACGAAATCTTTTTCGTCACACAAAATTTTTAGTGACGAAA  
CATGATTTATAGATGATGAAATTATTGTCCTCATAATCTAATTGTTGTAGTGATCA  
TTACTCCTTTGTTTGTTTATTTGTGATGTTAGTCCATTAATAAAAAAATATCTCTCTTCT  
TATGTACGTGAATGGTTGGAACGGATCTATTATATAATACTAATAAAGAATAGAAAA  
AGGAAAGTGAGTGAGGTTTCGAGGGAGAGAATCTGTTTAATATCAGAGTGCATCATGT  
GTCAATTTTATCGATATGACCCTAACTCAACTGAGTTAACCAATTCCGATAAGGCG  
AGAAATATCATAGTATTGAGTCTAGAAAAATCTCATGTAGTGTGGGGTAAACCTCAG  
CAAGGACGTTGAGTCCATAGAGGGGGTGTATGTGACACCCCAACCTCAGCAAAAAGA  
AAACCTCCCTCAAGAAGGACATTTGCGGTGCTAAACAATTTCAAGTCTCATCACACA  
TATATATATATTATATAATACTAATAAATAATAGAAAAGGAAAGGTAACATCACT  
AACGACAGTTGCGGTGCAAACCTGAGTGAGGTAATAAACATCACTAACTTTTTATTGGTT  
ATGTCAAACCTCAAAGTAAAATTTCTCAACTGTTTACGTGCCTATATATACCATGCTT  
GTTATATGCTCAAAGCACCAACAAAATTTAAAAACACTTTGAACATTTGCAAA

---

P\_ZmUBQ1

*Zea mays*

1814 bp

GGAGGTAATGAGCATTGCATGTCTAAGTTATAAAAAATTACCACATATTTTTTTTGTG  
ACACTTGTGTTGAAGTGCAGTTTATCTATCTTTATAACATATATTTAAACTTTACTCTACG  
AATAATATAATCTATAGTACTACAATAATATCAGTGTTTTAGAGAATCATATAAATGA  
ACAGTTAGACATGGTCTAAAGGACAATTGAGTATTTTGACAACAGGACTCTACAGTTT  
TATCTTTTTAGTGTGCATGTGTTCTCCTTTTTTTTTGCAAATAGCTTCACCTATATAATA  
CTTCATCCATTTTATTAGTACATCCATTTAGGGTTTAGGGTTAATGGTTTTTATAGACT  
AATTTTTTTAGTACATCTATTTTATTCTATTTTAGCCTCTAAATTAAGAAAACATAAAC  
TCTATTTTAGTTTTTTTATTTAATAATTTAGATATAAAAATAGAATAAAAATAAAGTGACT  
AAAAATTAACAAATACCCTTTAAGAAATTAAAAAAACTAAGGAAACATTTTTCTTG  
TTTCGAGTAGATAATGCCAGCCTGTAAACGCCGTCGACGAGTCTAACGGACACCAA  
CCAGCGAACCAGCAGCGTCGCGTCGGGCCAAGCGAAGCAGACGGCACGGCATCTCTG  
TCGCTGCCTCTGGACCCCTCTCGAGAGTCCGCTCCACCGTTGGACTTGCTCCGCTGTC  
GGCATCCAGAAATTGCGTGGCGGAGCGGCAGACGTGAGCCGGCACGGCAGGCGGCC  
TCCTCCTCCTCTCACGGCACCGGCAGCTACGGGGATTCTTTCCACCGCTCCTTCG  
TTCCCTTCCTCGCCCGCCGTAATAAATAGACACCCCTCCACACCCTCTTTCCCAAC  
CTCGTGTGTTGCGGAGCGCACACACACAACCAGATCTCCCCAAATCCACCCGTCG  
GCACCTCCGCTTCAAGTACGCCGCTCGTCTCCCCCCCCCCCCCTCTCTACCTTCTCT  
AGATCGGCGTTCCGGTCCATGGTTAGGGCCCGGTAGTTCTACTTCTGTTTCATGTTTGTG  
TTAGATCCGTGTTTGTGTTAGATCCGTGCTGCTAGCGTTCGTACACGGATGCGACCTG  
TACGTCAGACACGTTCTGATTGCTAACTTGCCAGTGTCTCTTTGGGGAATCCTGGG  
ATGGCTCTAGCCGTTCCGCAGACGGGATCGATTTTCATGATTTTTTTTGTTCGTTGCAT  
AGGGTTTGGTTTGCCTTTTCTTTATTTCAATATATGCCGTGCACTTGTTTGTGGGT  
CATTTTTTCATGCTTTTTTTTGTCTTGGTTGTGATGATGTGGTCTGGTTGGGCGGTCTG  
CTAGATCGGAGTAGAATTCTGTTTCAAACCTACCTGGTGGATTTATTAATTTGGATCT  
GTATGTGTGTGCCATACATATTCATAGTTACGAATTGAAGATGATGGATGGAAATATC  
GATCTAGGATAGGTATACATGTTGATGCGGGTTTTACTGATGCATATACAGAGATGCT  
TTTTGTTGCTTGGTTGTGATGATGTGGTGTGGTTGGGCGGTCTTCATTCGTTCTAGA  
TCGGAGTAGAATACTGTTTCAAACCTACCTGGTGTATTTATTAATTTGGAACTGTATGT  
GTGTGTCATACATCTTCATAGTTACGAGTTTAAGATGGATGGAAATATCGATCTAGGA  
TAGGTATACATGTTGATGTGGTTTTACTGATGCATATACATGATGGCATATGCAGCA  
TCTATTCATATGCTCTAACCTTGAGTACCTATCTATTATAATAACAAGTATGTTTTAT  
AATTATTT

---

P\_OsUbi

*rice*

1484 bp

Ma, X., et al. (2015). Mol Plant 8:1274-1284.

AGCCCCATTCACCACATTTGCTAGATAGTCGAAAAGCACCATCAATATTGAGCTTCAG  
GTATTTTTGGTTGTGTTGTGGTTGGATTGATTCTAATATATACCAATCAATATAATTC  
ACTACCAAAATATACCATAGCCATCACAACCTTTATTAATTTTGGTAGCTTAAGATGGT  
ATATATAATAACCAATTAACAACCTGATTCTAATTTTACTACGGCCCAGTATCTACCAA  
TACAAAACAACGAGTATGTTTTCTCCGTCGTAATCGTACACAGTACAAAAAACCTG  
GCCAGCCTTTCTTGGGCTGGGGCTCTCTTTGCAAAGGTCACAAAACGTACACGGCAGT  
AACGCCGCTTCGCTGCGTGTTAACGGCCACCAACCCCGCCGTGAGCAAACGGCATCA  
GCTTTCCACCTCCTCGATATCTCCGCGGCGCCGTCTGGACCCGCCCCCTTCCGTTCCCT  
TTCTTTCTCTCGCGTTTGCCTGGTGGGGACGGACTCCCCAAACCGCCTCTCCCTCTC  
TTTATTTGTCTATATTCTCACTGGGCCCCACCCACCGCACCCCTGGGCCCACTCACGA

---

GTCCCCCTCCCCACCTATAAAATACCCACCCCCTCCTCGCCTCTTCTCCATCAATC  
GAATCCCCAAAATCGCAGAGAAAAAAAATCTCCCCTCGAAGCGAAGCGTCGAATCG  
CCTTCTCAAGGTATGCGATTTTCTGATCCTCTCCGTTCTCGCGTTTGATTTGATTTCCC  
GGCCTGTTTCGTGATTGTGAGATGTTGTGGTTAGTCTCCGTTTTGCGATCTGTGGTAGAT  
TTGAACAGGGTTAGATGGGGTTCGCGTGGTATGCTGGATCTGTGATTATGAGCGATGC  
TGTTTCGTGGTCCAAGTATTGATTGGTTCGGATCTAGAAGTAGAACTGTGCTAGGGTTG  
TGATTTGTTCCGATCTGTTCAATCAGTAGGATTTAGTCTCTGTTTTTCTCGTTGATCCA  
AGTAGCAGCTTCAGGTATATTTGCTTAGGTTGTTTTGATTTCAGTCCCTCTAGTTGCA  
TAGATTCTACTCTGTTTCATGTTTAATCTAAGGGCTGCGTCTTGTTGATTAGTGATTACA  
TAGCATAGCTTTCAGGATATTTTACTTGCTTATGCCTATCTTATCAACTGTTGCACCTG  
TAAATTCTAGCCTATGTTAATTAACCTGCCTTATGTGCTCTCGGGATAGTGCTAGTAGT  
TATTGAATCAGTTTGCCGATGGAATTCTAGTAGTTCATAGACCTGCAGATTATTTTTGT  
GAACTCGAGCACGGTTCGTCTCTATTTGTTAGGTCAGTGTGGTGTGATAGGTA  
CACTGATGTTATTGTGGTTTAGATCGTGTATCTAACATATTGGAATAATTTGATTGACT  
GATTTCTGCTGTACTTGCTTGGTATTGTTATAATTTTCATGTTTCATAGTTGCTGACCATG  
CTTCGGTAATTGTGTGTGCAG

---

**Supplementary Table 2. Detailed information on the terminators used in this study**

| Terminator                                                                                                                                                                                                                                                                                                                                                                                                                                                                                                                                                                                                                                                                                  | Length | Reference                                                                   |
|---------------------------------------------------------------------------------------------------------------------------------------------------------------------------------------------------------------------------------------------------------------------------------------------------------------------------------------------------------------------------------------------------------------------------------------------------------------------------------------------------------------------------------------------------------------------------------------------------------------------------------------------------------------------------------------------|--------|-----------------------------------------------------------------------------|
| T_AtUbq10                                                                                                                                                                                                                                                                                                                                                                                                                                                                                                                                                                                                                                                                                   | 636 bp |                                                                             |
| ATCTCGTCTCTGTTATGCTTAAGAAGTTCAATGTTTCGTTTCATGTAAAACCTTGGT<br>GGTTTGTGTTTTGGGGCCTTGATAATCCCTGATGAATAAGTGTCTACTATGTTTC<br>CGTTCCTGTTATCTCTTTCTTCTAATGACAAGTCGAACTTCTTCTTTATCATCGCT<br>TCGTTTTTATTATCTGTGCTTCTTTGTTAATACGCCTGCAAAGTGACTCGACTCT<br>GTTTAGTGCAGTTCTGCGAACTTGAAATAGTCCAATTGTTGGCCTCTAGTAATA<br>GATGTAGCGAAAGTGTGAGCTGTTGGGTTCTAAGGATGGCTTGAACATGTAAAT<br>CTTTTAGGTTCTGAGTATGATGAACATTCGTTGTTGCTAAGAAATGCCTGTAATGT<br>CCCACAAATGTAGAAAATGGTTCGTACCTTTGTCCAAGCATTGATATGTCTGATGA<br>GAGGAACTGCAAGATACTGAGCTTGGTTAACGAAGGAGAGGCAGTTTCTTCT<br>TCCAAAGCATTTCATTTGACAATGCCTTGATCATCTTAAGTAGAGTTTCTGTTGTG<br>GAAAGTTTGAACTTTGAAGAAACGACTCTCAAGTAAATTGATGATCACAAGTGA<br>AAGTGATGTTACATAAGT |        |                                                                             |
| T_AtHsp70                                                                                                                                                                                                                                                                                                                                                                                                                                                                                                                                                                                                                                                                                   | 607 bp | Sung, D.Y., et al., (2001). <i>Plant Physiol</i> 126:789-800.               |
| GCCTTTTGGCTTTTGTACTCTGTTGCTTGAGATTCTAGTTGGTTTCTTGTCTTA<br>GTTTTATCTTCTATGTCACTCTGAAACTGGTGTGTGATCATTTTGATGCTTTAAGA<br>ATTTAGCTTTACCGTTTTTAAACTCGCTCTGACCTATGAAAGACGACTGGGCATA<br>ATACTCTACACGAAATATAGTAGACAAAGTGAAAGAAGTTAAGTTCATGGTTTAA<br>GGAATATGATCTTAGCACTTGTATTTATAATTAACCATCCAATATGAATCCAAGA<br>TCTCTTGTATACATATTAAGAAAATTTCTTCTTATTTCAATATAGTTTATCTGA<br>AAAACCGTACAAATTGTAGTGGGATTCCATATTCTATATATGAGATGTAAGATTC<br>ATTTGTTGTTGTCCAAAAAAAAAATGATTTCAATTTGTTAAAGAGTCTTCCATTGA<br>ATGTTGTCACATATTGCGTAACACAAATCAAGCATATGAACAAATAAGGAATTA<br>AGAGGTTAAAGAACACAATGAAATGGAGTAAATATGATTAATATGAATAATC<br>CAATGATACATGAACAATAAAATTTCTTTAAGAAGTTATGCGC                                       |        |                                                                             |
| T_AtHsp18.2                                                                                                                                                                                                                                                                                                                                                                                                                                                                                                                                                                                                                                                                                 | 238 bp | Farhi, M., et al. (2011). <i>Nat Biotechnol</i> 29:1072-1074                |
| ATATGAAGATGAAGATGAAATATTTGGTGTGCAAATAAAAAGCTTGTGTGCTTA<br>AGTTTGTGTTTTTTCTTGGCTTGTGTGTTATGAATTTGTGGCTTTTTCTAATATTA<br>AATGAATGTAAGATCTCATTATAATGAATAAAACAAATGTTTCTATAATCCATTGTG<br>AATGTTTTGTTGGATCTCTTCTGCAGCATATAACTACTGTATGTGCTATGGTATGG<br>ACTATGGAA                                                                                                                                                                                                                                                                                                                                                                                                                                    |        |                                                                             |
| T_AtAct2                                                                                                                                                                                                                                                                                                                                                                                                                                                                                                                                                                                                                                                                                    | 662 bp | Sarrion-Perdigones, A., et al., (2013). <i>Plant Physiol</i> 162:1618-1631. |
| GCTCTCAAGATCAAAGGCTTAAAAAGCTGGGGTTTTATGAATGGGATCAAAGTTT<br>CTTTTTTCTTTATATTTGCTTCTCCATTTGTTTGTTCATTTCCCTTTTTGTTTTCG<br>TTTCTATGATGCACTTGTGTGTGACAACTCTCTGGGTTTTTACTTACGTCTGCGTT<br>TCAAAAAAAAAAACCGCTTTCGTTTTGCGTTTTAGTCCCATTGTTTTGTAGCTCTG<br>AGTGATCGAATTGATGCCTCTTATTCCTTTTGTCCCTATAATTTCTTTCAAACCT<br>CAGAAGAAAAACCTTGAAACTCTTGAATGTTAATATAAGTATTGTATAAGATTT<br>TTATTGATTTGGTTATTAGTCTTACTTTTGCTACCTCCATCTTCACTTGGAACTGAT<br>ATTCTGAATAGTTAAAGCGTTACATGTCTTCCATTCACAAATGAACTTAAACTAGC<br>ACAAAGTCAGATATTTAAGATCGCACCATTTTATATAACCCCAATCGTCAATTCT<br>ACTGTTTCAAGTTTTACACCAAAAACAATTACGAGGTGTATCTATTCGTTACTCTTTT                                                                          |        |                                                                             |

CGCTTATTAATCCTTTTACATGATGCAAAATATAACAAATTAATTTCAAATTGTCC  
TGCACATTTGGTTTATAACATCTTGATTCCAAAAAGT

---

T\_AtG7 298 bp Butaye, K.M., et al., (2004). *Plant J* 39:440-449.  
GCTTACTGACTAACTAGGATGAGCTAAGCTAGCTATATCATCAATTTATGTATTAC  
ACATAATATCGCACTCAGTCTTTCATCTACGGCAATGTACCAGCTGATATAATCAG  
TTATTGAAATATTTCTGAATTTAACTTGCATCAATAAAATTTATGTTTTTGCTTGG  
CTATAATACCTGACTTGTATTTTATCAATAAAATTTAACTATATTTCTTTCAAG  
ATGGGAATTAACATCTACAAATTGCCTTTTCTTATCGACCATGTACCCCGGGTACC  
AAGCTTCTCGAG

---

T\_At3g24240 722 bp Shinohara, H., et al., (2016). *Proc Natl Acad Sci USA* 113:3897-3902.  
TTTTAAGGTTTGAAGGTTACGTGAGAAGAAAGCTTTTGTGTGTTGTTGAGAAAA  
GGCCTTTTTTTTTCATTTATCATTTTAAGTCTTTATATATGTTATGTATAAAAGAAG  
AAGAATAGAATGAGAGAAGTGAGTCAGTAATGTTATGGAATTGTGATTAGTAAAG  
GGTGACATGATATTGTACCTTTTTGGGCGGTTTGAATCAATAATTTCTCTAGTTTT  
CTCTCCAAGTGTGACTTTAGATTGAATGTAGTCCTTTATAGTTTTCACTCATAAAC  
AGTACTATATATACACCTTCCAGAAACGTATTAATAATAATATTGAATTATTGAT  
GCATAAAACAATTCTTCAAAAATGATATTTTCATGGGGCTCTTGAATCAGTAAGCC  
ACATAATATTGACCATGTTTTGGTTTACATGCAACATTATATTGCATACCGTCCG  
GCCAATTGAGTTGGTCTCTATTTTCTTTCTTCGTGTGGCAATTTTGGCACAATGAA  
AAAGCATGCATTTGACCTTTTTCATTTTTTAAACCTTGAGCCTTTCATATATTCTTA  
ATCTTACTATAATTGTTGATCACCAAATACATTTTGGAGAGCTAGAGCTGGTAAAT  
ACGTTTAGCTCTATTTCCATTCATTATAATTTGGAAAAATTGGATATTAAGGATCA  
TTTTTCAAAAATTTGTCCATCTATACCTTAGTTTGTAAATTGT

---

T\_nos 257 bp Farhi, M., et al. (2011). *Nat Biotechnol* 29:1072-1074  
CGTTCAAACATTTGGCAATAAAGTTTCTTAAGATTGAATCCTGTTGCCGGTCTTGC  
GATGATTATCATATAATTCTGTTGAATTACGTTAAGCATGTAATAATTAACATGT  
AATGCATGACGTTATTTATGAGATGGGTTTTTATGATTAGAGTCCCGCAATTATAC  
ATTTAATACGCGATAGAAAACAAAATATAGCGCGCAAACCTAGGATAAATTATCGC  
GCGCGGTGTCATCTATGTTACTAGATCGGG

---

T\_ocs 730 bp Farhi, M., et al. (2011). *Nat Biotechnol* 29:1072-1074  
ACTAGTCCCTAGAGTCCTGCTTAAATGAGATATGCGAGACGCCATGATCGCATG  
ATATTTGCTTTCAATTCTGTTGTGCACGTTGTAAAAACCTGAGCATGTGTAGCTC  
AGATCCTTACCGCCGTTTCGGTTCATTCTAATGAATATATCACCCGTTACTATCG  
TATTTTTATGAATAATATTCTCCGTTCAATTTACTGATTGTACCCTACTACTTATAT  
GTACAATATTTAAATGAAAACAATATATTGTGCTGAATAGGTTTATAGCGACATC  
TATGATAGAGCGCCACAATAACAAAACAATTGCGTTTTATTATTACAAATCCAATTT  
TAAAAAAAGCGGCAGAACCGGTCAAACCTAAAAGACTGATTACATAAATCTTATT  
CAAATTTCAAAGTGCCCCAGGGGCTAGTATCTACGACACACCGAGCGGCGAACT  
AATAACGCTCACTGAAGGGAACCTCCGGTTCCTCCGCGCGCATGGGTGAGATT  
CCTTGAAGTTGAGTATTGGCCGTCCGCTCTACCGAAAGTTACGGGCACCATTCAAC  
CCGGTCCAGCACGGCGGCCGGTAACCGACTTGCTGCCCGAGAATTATGCAGCA  
TTTTTTTGGTGTATGTGGGCCCCAAATGAAGTGCAGGTCAAACCTTGACAGTGACG  
ACAAATCGTTGGGCGGGTCCAGGGCGAATTTTGCACAACATGTCGAGGCTCAGC  
AGGA

---

|                                                                                                                                                                                                                                                                                                                                                                                                                                                                                                                                                                                                                                                                                                                                                                                                                                                                                                                                                                                                                         |        |                                                           |
|-------------------------------------------------------------------------------------------------------------------------------------------------------------------------------------------------------------------------------------------------------------------------------------------------------------------------------------------------------------------------------------------------------------------------------------------------------------------------------------------------------------------------------------------------------------------------------------------------------------------------------------------------------------------------------------------------------------------------------------------------------------------------------------------------------------------------------------------------------------------------------------------------------------------------------------------------------------------------------------------------------------------------|--------|-----------------------------------------------------------|
| T_mas                                                                                                                                                                                                                                                                                                                                                                                                                                                                                                                                                                                                                                                                                                                                                                                                                                                                                                                                                                                                                   | 265 bp | Chung, S.M., et al., (2005). Trends Plant Sci 10:357-361. |
| AATCTTGGACTCCCATGTTGGCAAAGGCAACCAAAACAACAAATGAATGATCCGCT<br>CCTGCATATGGGGCGGTTTGAGTATTTCAACTGCCATTTGGGCTGAATTGAAGACA<br>TGCTCCTGTCAGAAATCCGTGATCTTACTCAATATTCAGTAATCTCGGCCAATAT<br>CCTAAATGTGCGTGGCTTTATCTGTCTTTGTATTGTTTCATCAATTCATGTAACGTT<br>TGCTTTTCTTATGAATTTTCAAATAAATTATCAGATC                                                                                                                                                                                                                                                                                                                                                                                                                                                                                                                                                                                                                                                                                                                                   |        |                                                           |
| T_35S                                                                                                                                                                                                                                                                                                                                                                                                                                                                                                                                                                                                                                                                                                                                                                                                                                                                                                                                                                                                                   | 215 bp | Chung, S.M., et al., (2005). Trends Plant Sci 10:357-361. |
| GTCCGCAAAAATCACCAGTCTCTCTCTACAAATCTATCTCTCTATTTTTCTCCAG<br>AATAATGTGTGAGTAGTTCCCAGATAAGGGAATTAGGGTCTTATAGGGTTTCGCT<br>CATGTGTTGAGCATATAAGAAACCCCTTAGTATGTATTTGTATTTGTAAAATACTTC<br>TATCAATAAAAATTTCTAATTCCTAAAACCAAAATCCAGTGAC                                                                                                                                                                                                                                                                                                                                                                                                                                                                                                                                                                                                                                                                                                                                                                                          |        |                                                           |
| T_rbc                                                                                                                                                                                                                                                                                                                                                                                                                                                                                                                                                                                                                                                                                                                                                                                                                                                                                                                                                                                                                   | 922 bp | Chung, S.M., et al., (2005). Trends Plant Sci 10:357-361. |
| TCATAAGCCCGATGGCTACTAAGTTTACTATTTACCAAGACTTTTGAATATTAAC<br>CTTCTTGTAACGAGTCGGTTAAATTTGATTGTTTAGGGTTTTGTATTATTTTTTTTT<br>GGTCTTTTAATTCATCACTTTAATTCCTAATTGTCTGTTCAATTCGTTGTTTGTTC<br>CGGATCGATAATGAAATGTAAGAGATATCATATATAAATAATAAATTGTCGTTTC<br>ATATTTGCAATCTTTTTTTTACAAACCTTTAATCGTTGTATGTATGACATTTTCTTC<br>TTGTTATATTAGGGGAAATAATGTTAAATAAAAAGTACAAAATAAACTACAGTAC<br>ATCGTACTGAATAAATTACCTAGCCAAAAAGTACACCTTTCCATATACTTCCTACA<br>TGAAGGCATTTTCAACATTTTCAAATAAGGAATGCTACAACCGCATAATAACATC<br>CACAAATTTTTTTATAAAAATAACATGTCAGACAGTGATTGAAAAGATTTTATTATAG<br>TTTCGTTATCTTCTTTTCTCATTAAAGCGAATCACTACCTAACACGTCATTTTGTGAA<br>ATATTTTTTTGAATGTTTTTATATAGTTGTAGCATTCTCTTTTCAAATTAGGGTTTG<br>TTTGAGATAGCATTTCAGCCGGTTCATACAACCTTAAAAGCATACTCTAATGCTGGA<br>AAAAAGACTAAAAAATCTTGTAAGTTAGCGCAGAATATTGACCCAAATTATATAC<br>ACACATGACCCCATATAGAGACTAATTACCTTTTAAACCAATAAATTATTACTG<br>TATTATAACATCTACTAATTAACCTTGAGTGTGAGTTTTTGTAGAATTATTATCATATAT<br>ACTAAAAGGCAGGAACGCAAACATTGCCCGGTACTGTAGCAACTACGGTAGAC<br>GCATTAATTGTCTATAGTGGA |        |                                                           |
| T_ags                                                                                                                                                                                                                                                                                                                                                                                                                                                                                                                                                                                                                                                                                                                                                                                                                                                                                                                                                                                                                   | 406 bp | Farhi, M., et al., (2011). Nat Biotechnol 29:1072-1074    |
| GAATTAACAGAGGTGGATGGACAGACCCGTTCTTACACCGGACTGGGCGCGGGAT<br>AGGATATTCAGATTGGGATGGGATTGAGCTTAAAGCCGGCGCTGAGACCATGCTC<br>AAGGTAGGCAATGTCCTCAGCGTCGAGCCCGGCATCTATGTCGAGGGCATTGGTG<br>GAGCGCGCTTCGGGGATACCGTGCTTGTAAGTGAAGCCGGATATGAGGCCCTCAC<br>TCCGCTTGATCTTGCAAAGATATTTGACGCATTTATTAGTATGTGTTAATTTTCAT<br>TTGCAGTGCAGTATTTCTATTTCGATCTTTATGTAATTCGTTACAATTAATAAATAT<br>TCAAATCAGATTATTGACTGTCATTTGTATCAAATCGTGTAAATGGATATTTTTAT<br>TATAATATTGATGAT                                                                                                                                                                                                                                                                                                                                                                                                                                                                                                                                                                        |        |                                                           |
| T_3'utr-nos                                                                                                                                                                                                                                                                                                                                                                                                                                                                                                                                                                                                                                                                                                                                                                                                                                                                                                                                                                                                             | 495 bp | Peyret, H., et al., (2013). Plant Mol Biol 83:51-58.      |
| TTAACTCTGGTTTCATTAATTTTCTTTAGTTTGAATTTACTGTTATTCGGTGTGCA<br>TTTCTATGTTTGGTGAGCGGTTTTCTGTGCTCAGAGTGTGTTTATTTTATGTAATTT<br>AATTTCTTTGTGAGCTCCTGTTTAGCAGGTCGTCCCTTCAGCAAGGACACAAAAAG<br>ATTTTAATTTTATTAATAAAAAAAAAAAAAAAAAAAGACCGGGAATTCGATATCAAG<br>CTTATCGACCTGCAGATCGTTCAAACATTTGGCAATAAAGTTTCTTAAGATTGAAT                                                                                                                                                                                                                                                                                                                                                                                                                                                                                                                                                                                                                                                                                                              |        |                                                           |



CCTGTTGCCGGTCTTGCGATGATTATCATATAATTTCTGTTGAATTACGTTAAGCA  
TGTAATAATTAACATGTAATGCATGACGTTATTTATGAGATGGGTTTTTATGATTA  
GAGTCCCGCAATTATACATTTAATACGCGATAGAAAACAAAATATAGCGCGCAAA  
CTAGGATAAATTATCGCGCGCGGTGTCATCTATGTTACTAGATCTCT

---

**Supplementary Table 3. Primers used in this study.**

| Primer            | Sequence (5'→3')                                                                   |
|-------------------|------------------------------------------------------------------------------------|
| GG3-BsaI-F        | AGTGAATTGTTAATGGAGAGAGACCCCGATGGAAACGTTTAAGCAGG<br>TCTCCCGCTCGTAATCATGGTCATA       |
| GG3-BsaI-R        | TATGACCATGATTACGAGCGGGAGACCTGCTTAAACGTTTCCATCGGG<br>GTCTCTCTCCATTAACAATCACT        |
| 43-BsaI-F         | CTTTTAAGAAGTTATGCGCCGCTGGAGAGAGACCCCGATGGAAAC                                      |
| 43-inter-R        | CAAGCTGGAAACCTTCCGC                                                                |
| 43-inter-F        | GCGGAAGGTTTCCAGCTTG                                                                |
| 43-BsaI-R         | CAGCTATGACCATGATTACGAGCGGGAGACCTGCTTAAACGTTTCCAT<br>CGGGGTCTCTCTCCAGCGGCATAACTTCTT |
| GFP208-F          | TGCAGTGCTTCAGCCGCTA                                                                |
| GFP494-R          | AGTTCACCTTGATGCCGTTT                                                               |
| qP19-F            | GACTGAGTGGCGGCTACAT                                                                |
| qP19-R            | TCCTCCAGAAACGGTGATAC                                                               |
| Fluc-F-635        | ATAGAAGTGCCTGCGTGAG                                                                |
| Fluc-R-886        | CGAAGAAGGAGAATAGGGTT                                                               |
| REN-F-194         | CACATATTGAGCCAGTAGCG                                                               |
| REN-R-476         | ATATCAGGCCATTCATCCC                                                                |
| P_CaMV35S_RmBsa-F | GGAATTCGGTCTCAGGAGGGAAACCTCCTCGGATTCC                                              |
| P_CaMV35S_RmBsa-R | CGGGATCCGGTCTCACATTCTCTCCAAATGAAATGAAC                                             |
| P_CsVMV-F         | GGAATTCGGTCTCAGGAGCCAGAAGGTAATTATCCAAG                                             |
| P_CsVMV-R         | CGGGATCCGGTCTCACATTACAACTTACAAATTTCTCTG                                            |
| P_35S-5'UTR-F     | CGGTCTCAGGAGGGAAACCTCCTCGGATTCCAT                                                  |
| P_35S-5'UTR-R     | CGGTCTCACATTTCGCAATTTGGGCAGAATATACAG                                               |
| P_MAS-1-F         | GGAATTCGGTCTCAGGAGTTTTCAAATCAGTGCGCAAG                                             |
| P_MAS-1-R         | CGGGATCCGGTCTCACATTCGATTTGGTGTATCGAGATTGG                                          |
| P_Ocs-1-F         | GGAATTCGGTCTCAGGAGATCATTAATTTCCACCTTAC                                             |
| P_Ocs-1-R         | CGGGATCCGGTCTCACATTTTGGTAGATTGCAAATATAATG                                          |
| P_AtAct 2-F       | GGAATTCGGTCTCAGGAGTCGACAAAATTTAGAACGAAC                                            |
| P_AtAct 2-R       | CGGGATCCGGTCTCACATTTTCAAAGCGGAGAGGAAAATATATG                                       |
| P_AtFBA2-F        | GGAATTCGGTCTCAGGAGCCTACACATCCACTTGCC                                               |
| P_AtFBA2-R        | CGGGATCCGGTCTCACATTTTTTTTTTGTGTGTGTTATC                                            |
| P_AtRbcs1a-F      | GGAATTCGGTCTCAGGAGAACATTCATACGTTTTTCAATTTG                                         |
| P_AtRbcs1a-R      | CGGGATCCGGTCTCACATTTTGTCTTCTTACTCTTTGTG                                            |
| P_AtUbq10-F       | GGAATTCGGTCTCAGGAGTACCCGACGAGTCAGTAATAAAC                                          |
| P_AtUbq10-R       | CGGGATCCGGTCTCACATTAGTGTTAATCAGAAAACTC                                             |
| P_AtHsp18-F       | GGAATTCGGTCTCAGGAGAAGCTTTTCTTTCATTTCTC                                             |
| P_AtHsp18-R       | CGGGATCCGGTCTCACATTGACTTTTGGTTCTTGATTTTCC                                          |
| P_AtHsp70-F       | GGAATTCGGTCTCAGGAGGAAGTGCAGAAAAAGGGAGC                                             |
| P_AtHsp70-R       | CGGGATCCGGTCTCACATTTGCTAAAAAAGCTTCAGTAATTG                                         |
| P_At2S3-F         | GGAATTCGGTCTCAGGAGGAAACCAAATTAACATAGG                                              |
| P_At2S3-R         | CGGGATCCGGTCTCACATTGTTTTGCTATTTGTGTATGTTTTT                                        |
| P_AtBch1-F        | GGAATTCGGTCTCAGGAGTGCCTTAATCTTGTCTGCAATG                                           |

|                  |                                               |
|------------------|-----------------------------------------------|
| P_AtBch1-R       | CGGGATCCGGTCTCACATTCTAATGGAAGGAGGAGCTAC       |
| P_AtUbq3-F       | ATGGTCTCAGGAGCAGAGCTAAATCCAAAAAATATG          |
| P_AtUbq3-R       | ATGGTCTCACATTCTGAAATAAAACAATAGAACAAG          |
| P_At3g24240-F    | ATGGTCTCAGGAGGAAAAAGTGATGGAAACTCGG            |
| P_At3g24240-R    | ATGGTCTCACATTTTGCCTCAAATACGAAAAGAAG           |
| P_AtJAL34-F      | GGAATTCGGTCTCAGGAGGCTAATGACATTAGATCG          |
| P_AtJAL34-R      | CGGGATCCGGTCTCACATTCTGTTGACTTCTTTTATC         |
| P_AtWRKY6-F      | GGAATTCGGTCTCAGGAGGTCGGTGACAAGCAACGAAAC       |
| P_AtWRKY6-R      | CGGGATCCGGTCTCACATTATATAGAAAAAGAAAGAGATCACG   |
| P_AtHY5-F        | GGAATTCGGTCTCAGGAGGAGCATTGGGTGTTGGTG          |
| P_AtHY5-R        | CGGGATTCGGTCTCACATTTTTCTTACTCTTTGAAGATCG      |
| P_CasP1-F        | GGAATTCGGTCTCAGGAGAATAACGCATGCATTGTATTTGTATTC |
| P_CasP1-R        | CGGGATTCGGTCTCACATTTTCTTGTCAATTGGGGTTTAAAG    |
| P_DAISSY-F       | GGAATTCGGTCTCAGGAGATTAATGCTCGCTTTGATTG        |
| P_DAISSY-R       | CGGGATCCGGTCTCACATTGGTAGGTTTTTGGTTTTAAATG     |
| P_KCR1-F         | GGAATTCGGTCTCAGGAGCCAAGAAAGTTGGAAGAGGAAG      |
| P_KCR1-R         | CGGGATCCGGTCTCACATTAGAGAAGAAAGTTGAGACTTTGG    |
| P_HORST-F        | GGAATTCGGTCTCAGGAGTATGCATCGATGATGATTCTGCC     |
| P_HORST-R        | CGGGATCCGGTCTCACATTATCCCGGTTTAGGCTTTTTGC      |
| P_GPAT5-F        | GGAATTCGGTCTCAGGAGTGATCGCAAACGTCAATG          |
| P_GPAT5-R        | CGGGATCCGGTCTCACATTTCTTTGTTTTTGTCTCG          |
| P_ASTF-F         | GGAATTCGGTCTCAGGAGCAGGTTCTTCATCATCATTAC       |
| P_ASTF-R         | CGGGATCCGGTCTCACATTTTGATCCAAATGGAGAAAACAGC    |
| P_FAR4-F         | GGAATTCGGTCTCAGGAGAGTTCTAACCCCGACATAAGG       |
| P_FAR4-R         | CGGGATCCGGTCTCACATTGAAGAACTTATATCTATCC        |
| P_AtIRX5-F       | GGAATTCGGTCTCAGGAGATGAAGCCATCCTCTACCTCGG      |
| P_AtIRX5-R       | CGGGATCCGGTCTCACATTGGCGAGGTACACTGAGCTC        |
| P_CYP86B1-F      | GGAATTCGGTCTCAGGAGCTAAACACAACAAGTTTTCATGAG    |
| P_CYP86B1-R      | CGGGATCCGGTCTCACATTGTGACAAAGAGAAGAGAGAGCG     |
| P_AtRD29A-F      | ATTGGTCTCGGGAGGAGATTTGGGGTTTTGCTTTTG          |
| P_AtRD29A-R      | ATTGGTCTCACATTCCAAAGATTTTTTCTTTCC             |
| P_AtRD29B-F      | ATTGGTCTCGGGAGGCGTAATTTCTAGATCCGTCTTGG        |
| P_AtRD29B-R      | ATTGGTCTCACATTCCAAAGCTGTGTTTTCTC              |
| P_MpUbiC-4-F     | ATTGGTCTCGGGAGGGTATGAATCATTGTAGAGAC           |
| P_MpUbiC-4-R     | ATTGGTCTCACATTGATCCTTCTTCTCACTCAC             |
| P_MpUbiC-2-F     | ATTGGTCTCGGGAGGTCGCTGTCCAGAGACACTTTTAC        |
| P_MpUbiC-2-R     | ATTGGTCTCACATTCTTCTCCCGACGACAACCG             |
| P_MpUbiC-3-F     | ATTGGTCTCGGGAGGATAGAGTTGATCGAGAGATTG          |
| P_MpUbiC-3-R     | ATTGGTCTCACATTCTTGGCGGAGCGCACCCGG             |
| P_MpEFla-5'UTR-F | ATTGGTCTCGGGAGGCAAATGAGTCACACACATTG           |
| P_MpEFla-5'UTR-R | ATTGGTCTCACATTCAACCTTCTGCAGGCAC               |
| P_StGBSS-F       | ATTGGTCTCGGGAGAAGCTTTAACGAGATAGAAAATTATATTAC  |
| P_StGBSS-R       | ATTGGTCTCACATTTGCATGAAATCAGAAATAATTGGAG       |
| P_StUbi-F        | ATTGGTCTCGGGAGGGAATCTAATACTTACCTCTTAG         |

|               |                                                                 |
|---------------|-----------------------------------------------------------------|
| P_StUbi-R     | ATTGGTCTCACATTCTGCAAATTCATAAAAAACAAC                            |
| P_StPat-F     | ATTGGTCTCGGGAGAAGCTTATGTTGCCATATAGAG                            |
| P_StPat-R     | ATTGGTCTCACATTTTTGCAAATGTTCAAAGTGTTTTAAATTTTG                   |
| P_ZmUBQ1-F    | ATTGGTCTCGGGAGGTAATGAGCATTGCATGTCTAAGTTATAAAAAAT<br>TACC        |
| P_ZmUBQ1-R    | ATTGGTCTCACATTAATAATTATAAAAACATACTTGTTTATTATAATA<br>GATAGGTACTC |
| P_OsUbi-F     | ATTGGTCTCGGGAGAGCCCCATTACCACATTTG                               |
| P_OsUbi-R     | ATTGGTCTCACATTCTGCACACACAATTACC                                 |
| T_AtUbq10-F   | GGAATTCGGTCTCAGCTTATCTCGTCTCTGTTATGCT                           |
| T_AtUbq10-R   | CGGGATCCGGTCTCAAGCGCACTTATGTAACATACACTTTC                       |
| T_AtHsp70-F   | GGAATTCGGTCTCAGCTTGCCTTTTGGCTTTTGTTFCTC                         |
| T_AtHsp70-R   | CGGGATCCGGTCTCAAGCGGCGCATAACTTCTTAAAAG                          |
| T_AtHsp18.2-F | GGAATTCGGTCTCAGCTTATATGAAGATGAAGATGAAATATTTG                    |
| T_AtHsp18.2-R | CGGGATCCGGTCTCAAGCGTTCATAGTCCATACCATAGCAC                       |
| T_AtAct2-F    | GGAATTCGGTCTCAGCTTGCTCTCAAGATCAAAGGCTTAAAAAG                    |
| T_AtAct2-R    | CGGGATCCGGTCTCAAGCGACTTTTTGGAATCAAGATGTATAAAC                   |
| T_AtG7-F      | GGAATTCGGTCTCAGCTTACTGACTAACTAGGATGAGCTAAG                      |
| T_AtG7-R      | CGGGATCCGGTCTCAAGCGCTCGAGAAGCTTGGTACCCG                         |
| T_At3g24240-F | GGAATTCGGTCTCAGCTTTTTTAAGGTTTGAAGGTTACGTG                       |
| T_At3g24240-R | CGGGATCCGGTCTCAAGCGACAATTTACAAACTAAGGTATAG                      |
| T_nos-F       | GGAATTCGGTCTCAGCTTCGTTCAAACATTTGGCAATAAAG                       |
| T_nos-R       | CGGGATCCGGTCTCAAGCGCCCGATCTAGTAACATAGATGAC                      |
| T_3'utr-nos-F | TTCGGTCTCAGCTTTTAACTCTGGTTTCATTAAATTTTC                         |
| T_3'utr-nos-R | TCCGGTCTCAAGCGAGAGATCTAGTAACATAGATG                             |
